# Supplementary material for: Chilensosides E, F, and G—New Tetrasulfated Triterpene Glycosides from the Sea Cucumber Paracaudina chilensis (Caudinidae, Molpadida): Structures, Activity, and Biogenesis
Source: MDPI journal article supplement (doi:10.3390/md21020114), 2023-02-05
Supplement: s1 [file s1]

## Supplementary data content page

**Title:** Chilensosides E, F, and G – New Tetrasulfated Triterpene Glycosides from the Sea Cucumber *Paracaudina chilensis* (Caudinidae, Molpadida): Structures, Activity and Biogenesis.

**Authors:** Alexandra S. Silchenko, Sergey A. Avilov, Roman S. Popov, Pavel S. Dmitrenok, Ekaterina A. Chingizova, Boris B. Grebnev, Anton B. Rasin and Vladimir I. Kalinin\*

**Address:** G.B. Elyakov Pacific Institute of Bioorganic Chemistry, Far Eastern Branch of Russian Academy of Sciences, Pr. 100-let Vladivostoka 159, 690022 Vladivostok, Russia

**Correspondence:** kalininv@piboc.dvo.ru; Tel.: +7-423-231-1168

### Content:

Figure S1. The  $^{13}\text{C}$  NMR (125.67 MHz) spectrum of chilensoside E (**1**) in  $\text{C}_5\text{D}_5\text{N}/\text{D}_2\text{O}$  (4/1)

Figure S2. The  $^1\text{H}$  NMR (500.12 MHz) spectrum of chilensoside E (**1**) in  $\text{C}_5\text{D}_5\text{N}/\text{D}_2\text{O}$  (4/1)

Figure S3. The COSY (500.12 MHz) spectrum of chilensoside E (**1**) in  $\text{C}_5\text{D}_5\text{N}/\text{D}_2\text{O}$  (4/1)

Figure S4. The HSQC (500.12 MHz) spectrum of chilensoside E (**1**) in  $\text{C}_5\text{D}_5\text{N}/\text{D}_2\text{O}$  (4/1)

Figure S5. The ROESY (500.12 MHz) spectrum of chilensoside E (**1**) in  $\text{C}_5\text{D}_5\text{N}/\text{D}_2\text{O}$  (4/1)

Figure S6. The HMBC (500.12 MHz) spectrum of chilensoside E (**1**) in  $\text{C}_5\text{D}_5\text{N}/\text{D}_2\text{O}$  (4/1)

Figure S7. 1 D TOCSY (500.12 MHz) spectra of Xyl1, Qui2, Glc3, Glc4, MeGlc5 of chilensoside E (**1**) in  $\text{C}_5\text{D}_5\text{N}/\text{D}_2\text{O}$  (4/1)

Figure S8. HR-ESI-MS and ESI-MS/MS spectra of chilensoside E (**1**)

Figure S9. The  $^{13}\text{C}$  NMR (125.67 MHz) spectrum of chilensoside F (**2**) in  $\text{C}_5\text{D}_5\text{N}/\text{D}_2\text{O}$  (4/1)

Figure S10. The  $^1\text{H}$  NMR (500.12 MHz) spectrum of chilensoside F (**2**) in  $\text{C}_5\text{D}_5\text{N}/\text{D}_2\text{O}$  (4/1)

Figure S11. The COSY (500.12 MHz) spectrum of chilensoside F (**2**) in  $\text{C}_5\text{D}_5\text{N}/\text{D}_2\text{O}$  (4/1)

Figure S12. The HSQC (500.12 MHz) spectrum of chilensoside F (**2**) in  $\text{C}_5\text{D}_5\text{N}/\text{D}_2\text{O}$  (4/1)

Figure S13. The HMBC (500.12 MHz) spectrum of chilensoside F (**2**) in  $\text{C}_5\text{D}_5\text{N}/\text{D}_2\text{O}$  (4/1)

Figure S14. The ROESY (500.12 MHz) spectrum of chilensoside F (**2**) in  $\text{C}_5\text{D}_5\text{N}/\text{D}_2\text{O}$  (4/1)

Figure S15. 1D TOCSY (500.12 MHz) spectra of Xyl1, Qui2, Glc3, Glc4, MeGlc5 of chilensoside F (**2**) in  $\text{C}_5\text{D}_5\text{N}/\text{D}_2\text{O}$  (4/1)

Figure S16. HR-ESI-MS and ESI-MS/MS spectra of chilensoside F (**2**)

Table S1.  $^{13}\text{C}$  and  $^1\text{H}$  NMR chemical shifts, HMBC and ROESY correlations of the aglycone part of chilensoside F (**2**)

Figure S17. The  $^{13}\text{C}$  NMR (125.67 MHz) spectrum of chilensoside G (**3**) in  $\text{C}_5\text{D}_5\text{N}/\text{D}_2\text{O}$  (4/1)

Figure S18. The  $^1\text{H}$  NMR (500.12 MHz) spectrum of chilensoside G (**3**) in  $\text{C}_5\text{D}_5\text{N}/\text{D}_2\text{O}$  (4/1)

Figure S19. The COSY (500.12 MHz) spectrum of chilensoside G (**3**) in  $\text{C}_5\text{D}_5\text{N}/\text{D}_2\text{O}$  (4/1)

Figure S20. The HSQC (500.12 MHz) spectrum of chilensoside G (**3**) in  $\text{C}_5\text{D}_5\text{N}/\text{D}_2\text{O}$  (4/1)

Figure S21. The ROESY (500.12 MHz) spectrum of chilensoside G (**3**) in  $\text{C}_5\text{D}_5\text{N}/\text{D}_2\text{O}$  (4/1)

Figure S22. The HMBC (500.12 MHz) spectrum of chilensoside G (**3**) in  $\text{C}_5\text{D}_5\text{N}/\text{D}_2\text{O}$  (4/1)

Figure S23. 1D TOCSY (500.12 MHz) spectra of Xyl1, Qui2, Glc3, Glc4, Glc5, MeGlc6 of chilensoside G (**3**) in  $\text{C}_5\text{D}_5\text{N}/\text{D}_2\text{O}$  (4/1)

Figure S24. HR-ESI-MS and ESI-MS/MS spectra of chilensoside G (**3**)

Table S2.  $^{13}\text{C}$  and  $^1\text{H}$  NMR chemical shifts, HMBC and ROESY correlations of the aglycone part of chilensoside G (**3**)

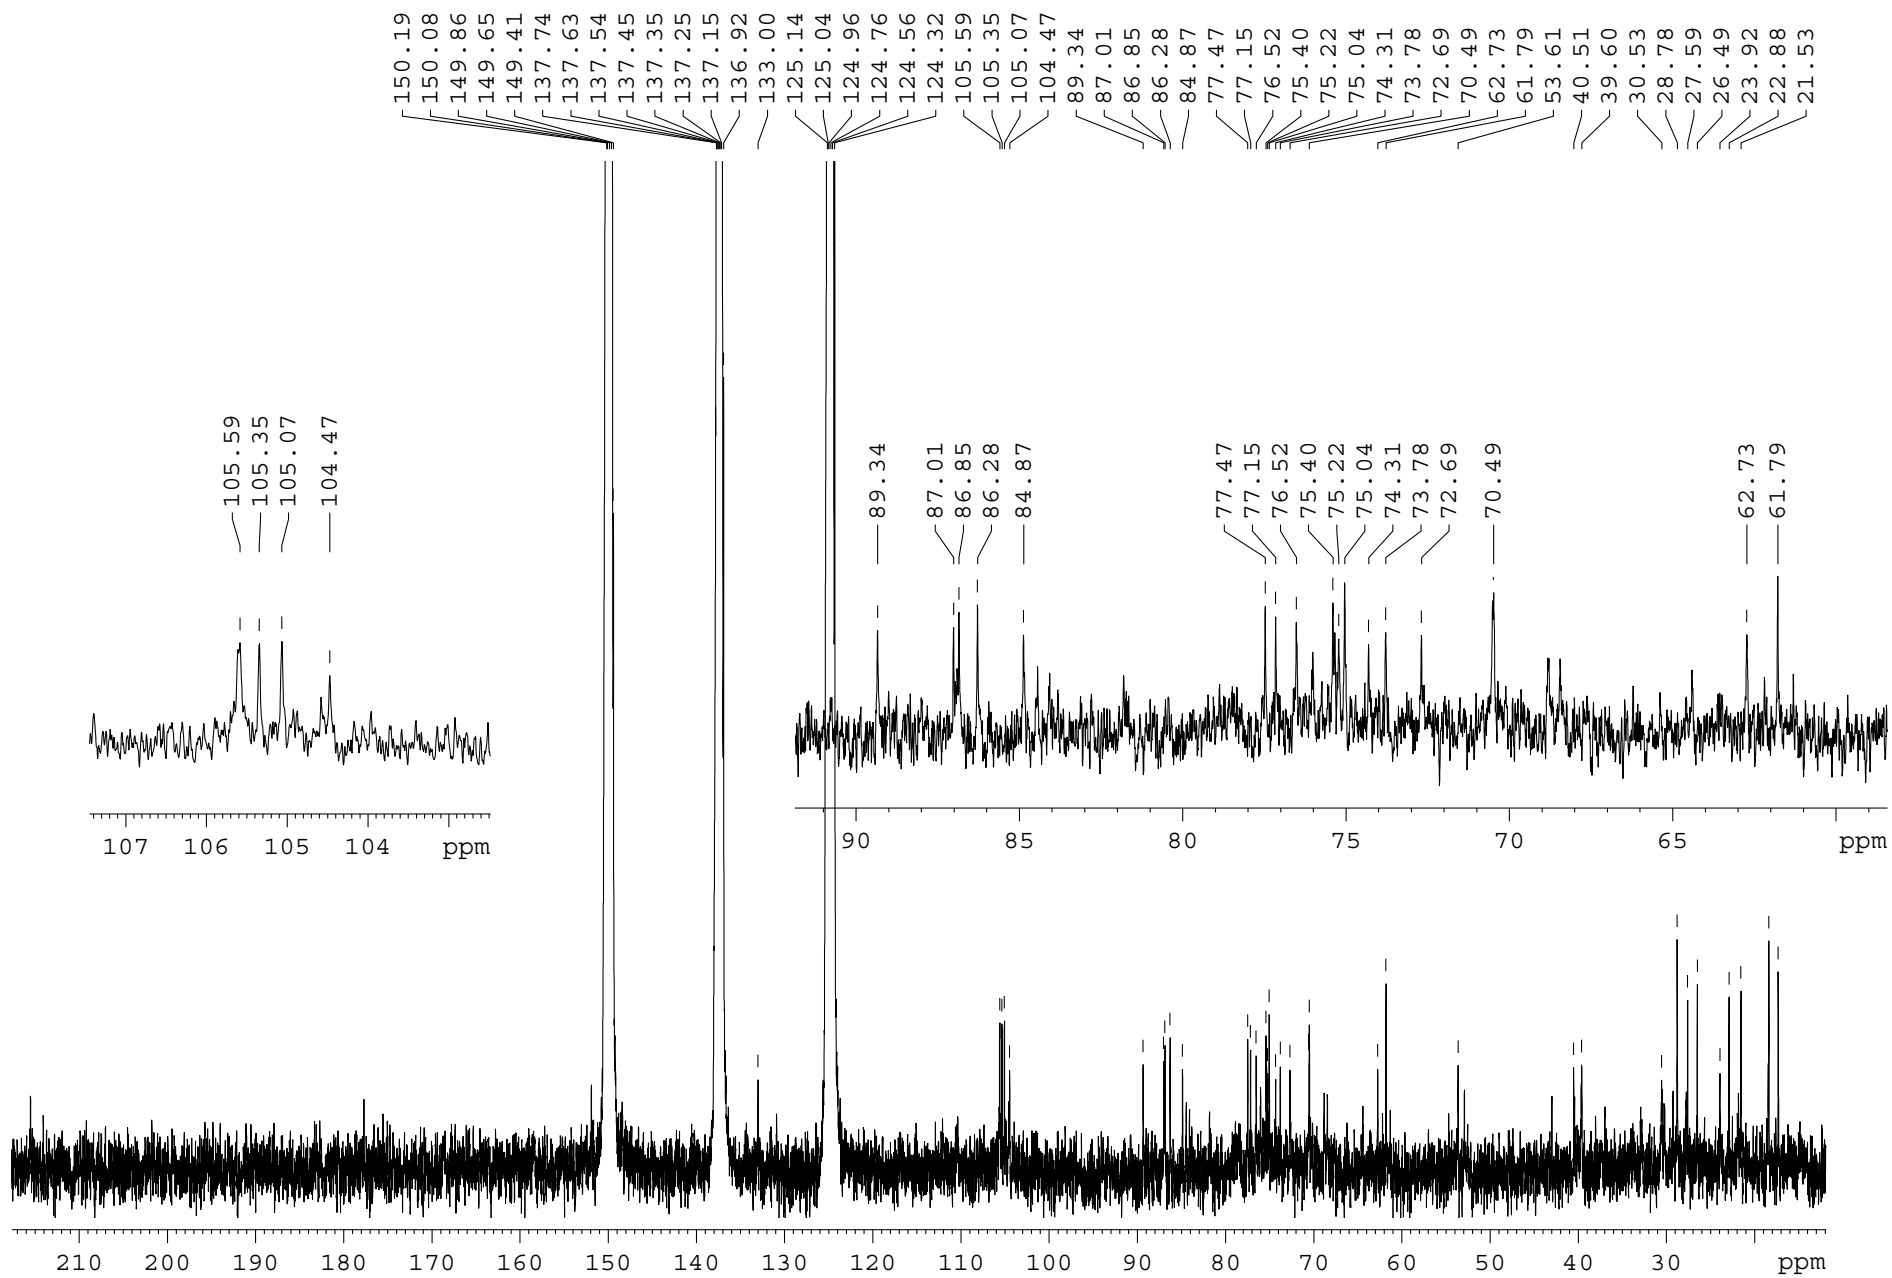

Figure S1. The  $^{13}\text{C}$  NMR (125.67 MHz) spectrum of chilensoside E (1) in  $\text{C}_5\text{D}_5\text{N}/\text{D}_2\text{O}$  (4/1)

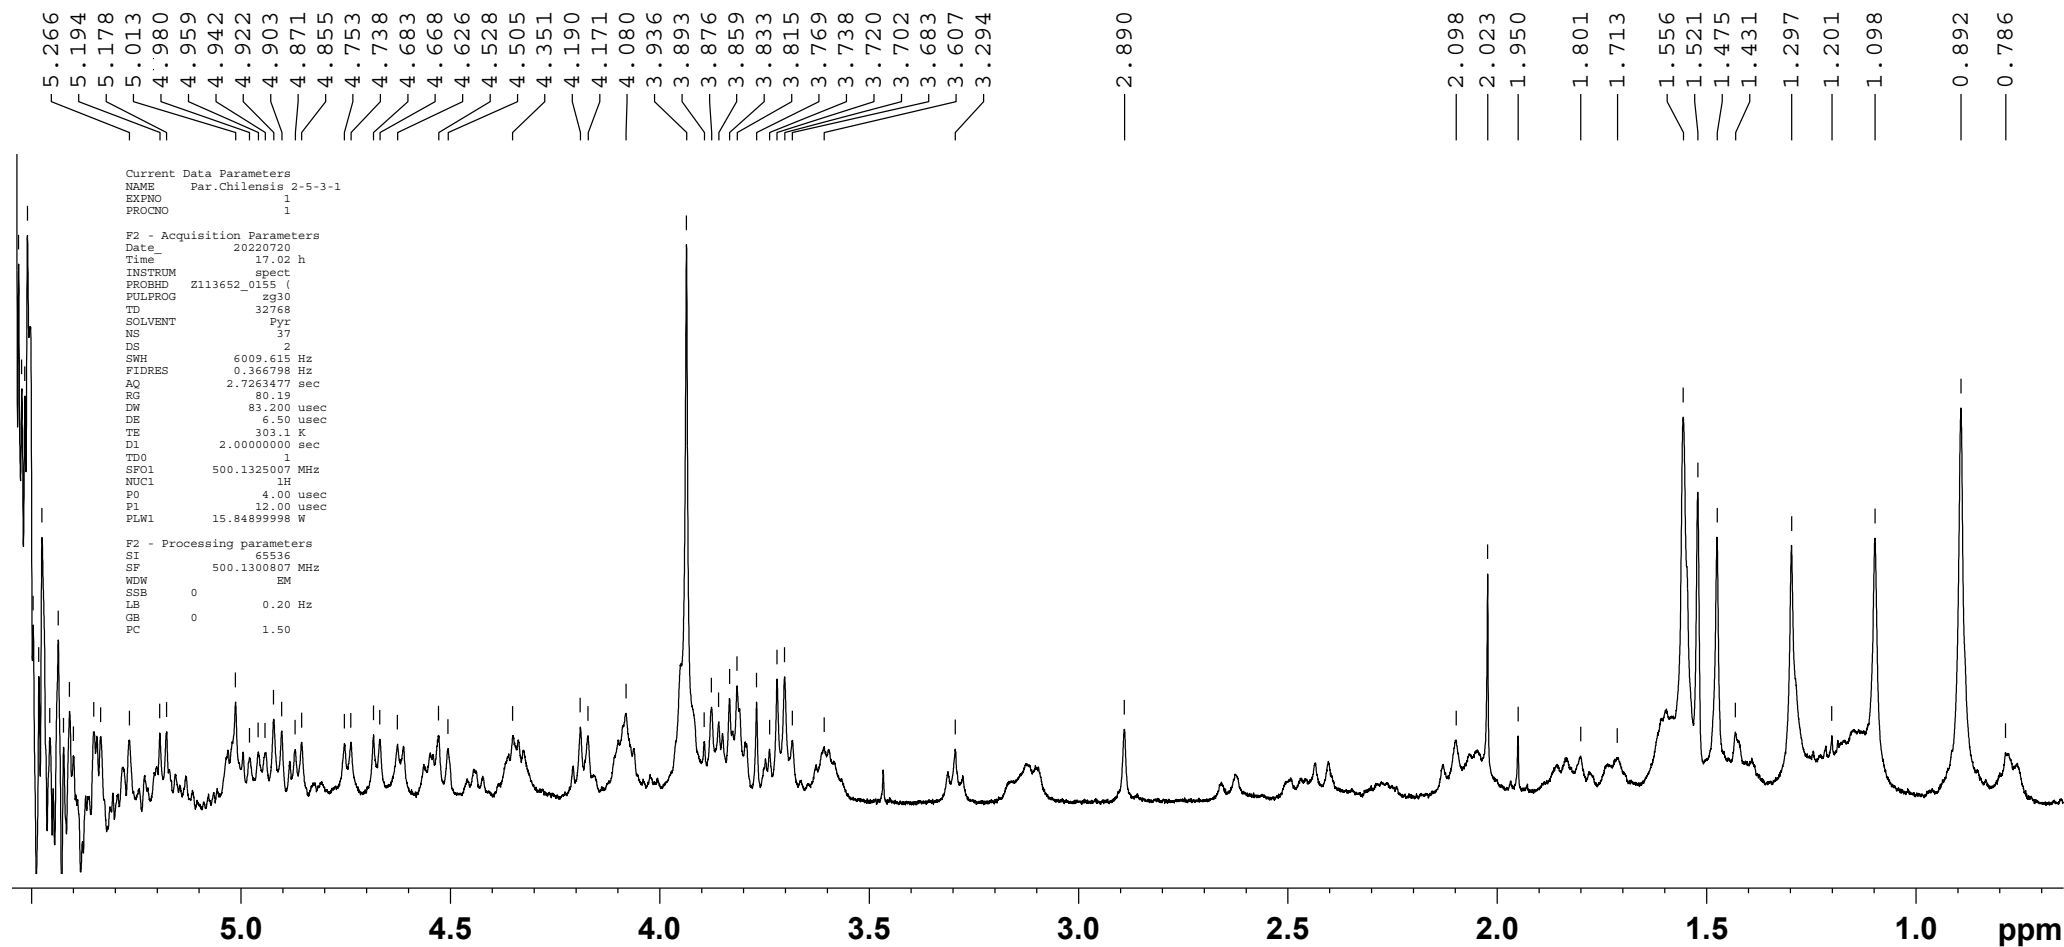

Figure S2. The  $^1\text{H}$  NMR (500.12 MHz) spectrum of chilensoside E (**1**) in  $\text{C}_5\text{D}_5\text{N}/\text{D}_2\text{O}$  (4/1)

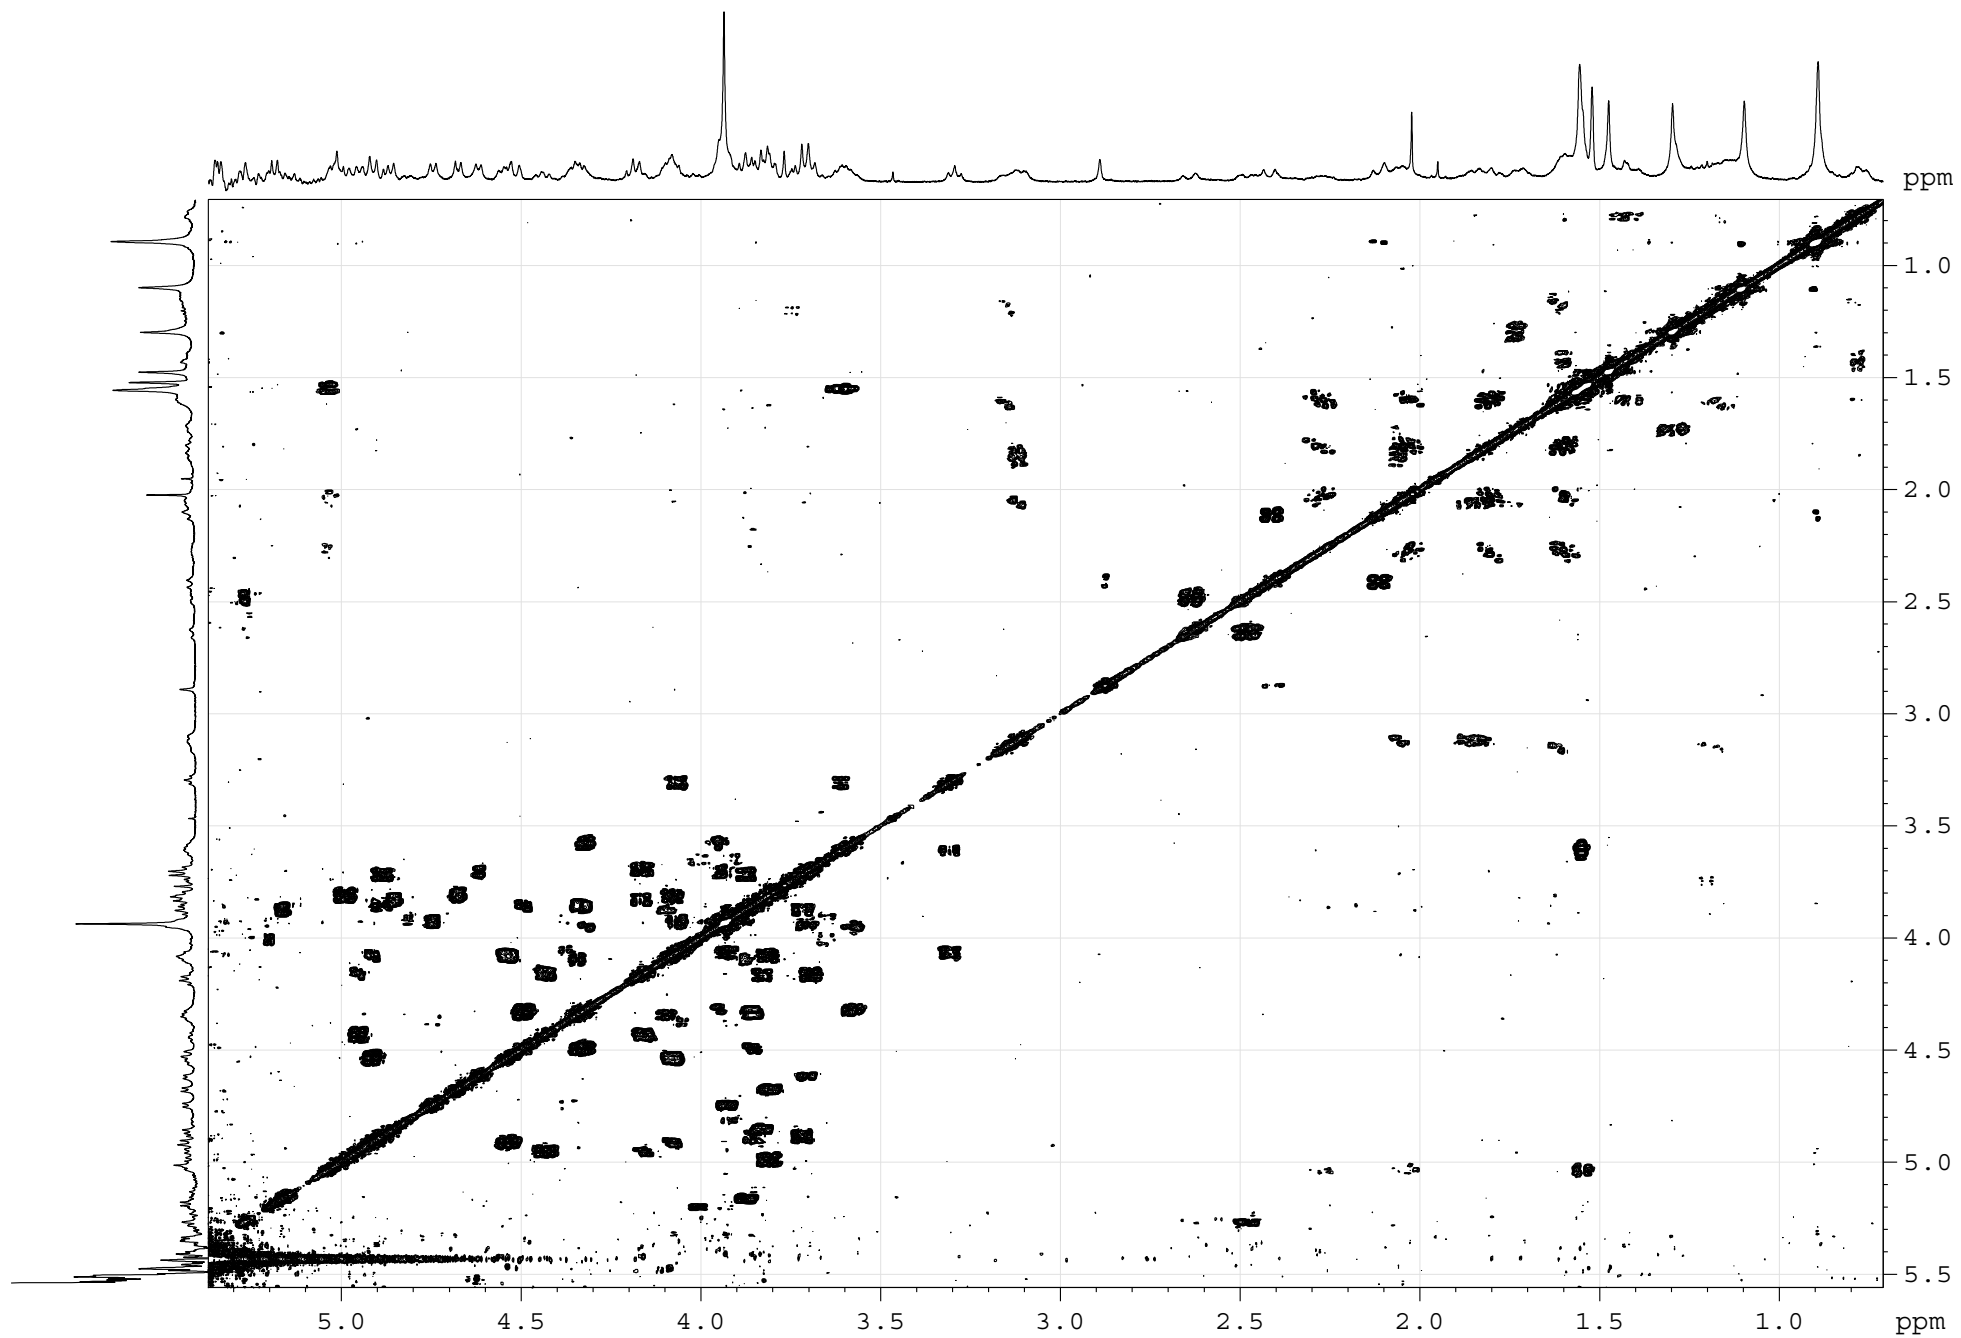

Figure S3. The COSY (500.12 MHz) spectrum of chilensoside E (**1**) in C<sub>5</sub>D<sub>5</sub>N/D<sub>2</sub>O (4/1)

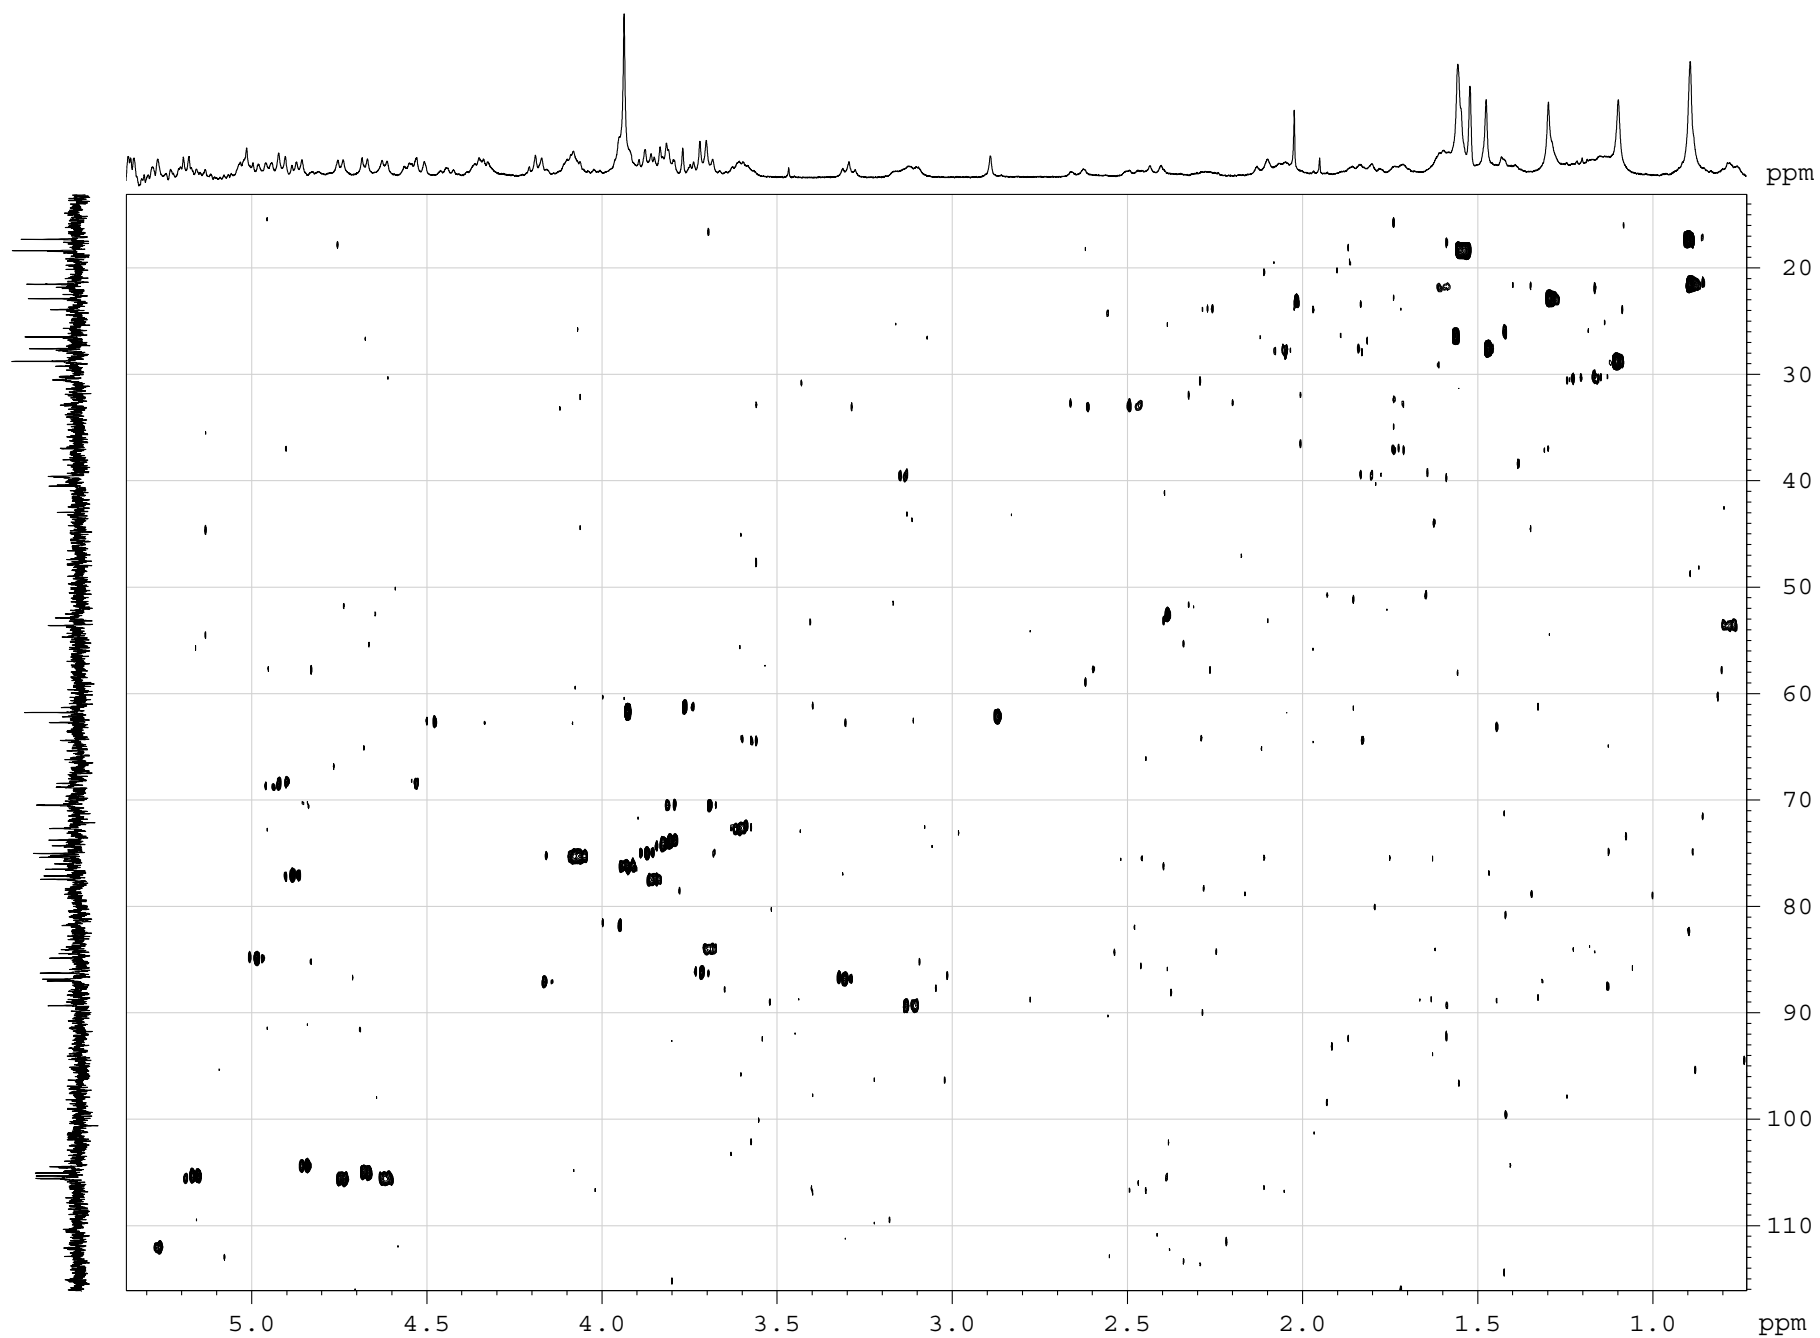

Figure S4. The HSQC (500.12 MHz) spectrum of chilensoside E (**1**) in  $C_5D_5N/D_2O$  (4/1)

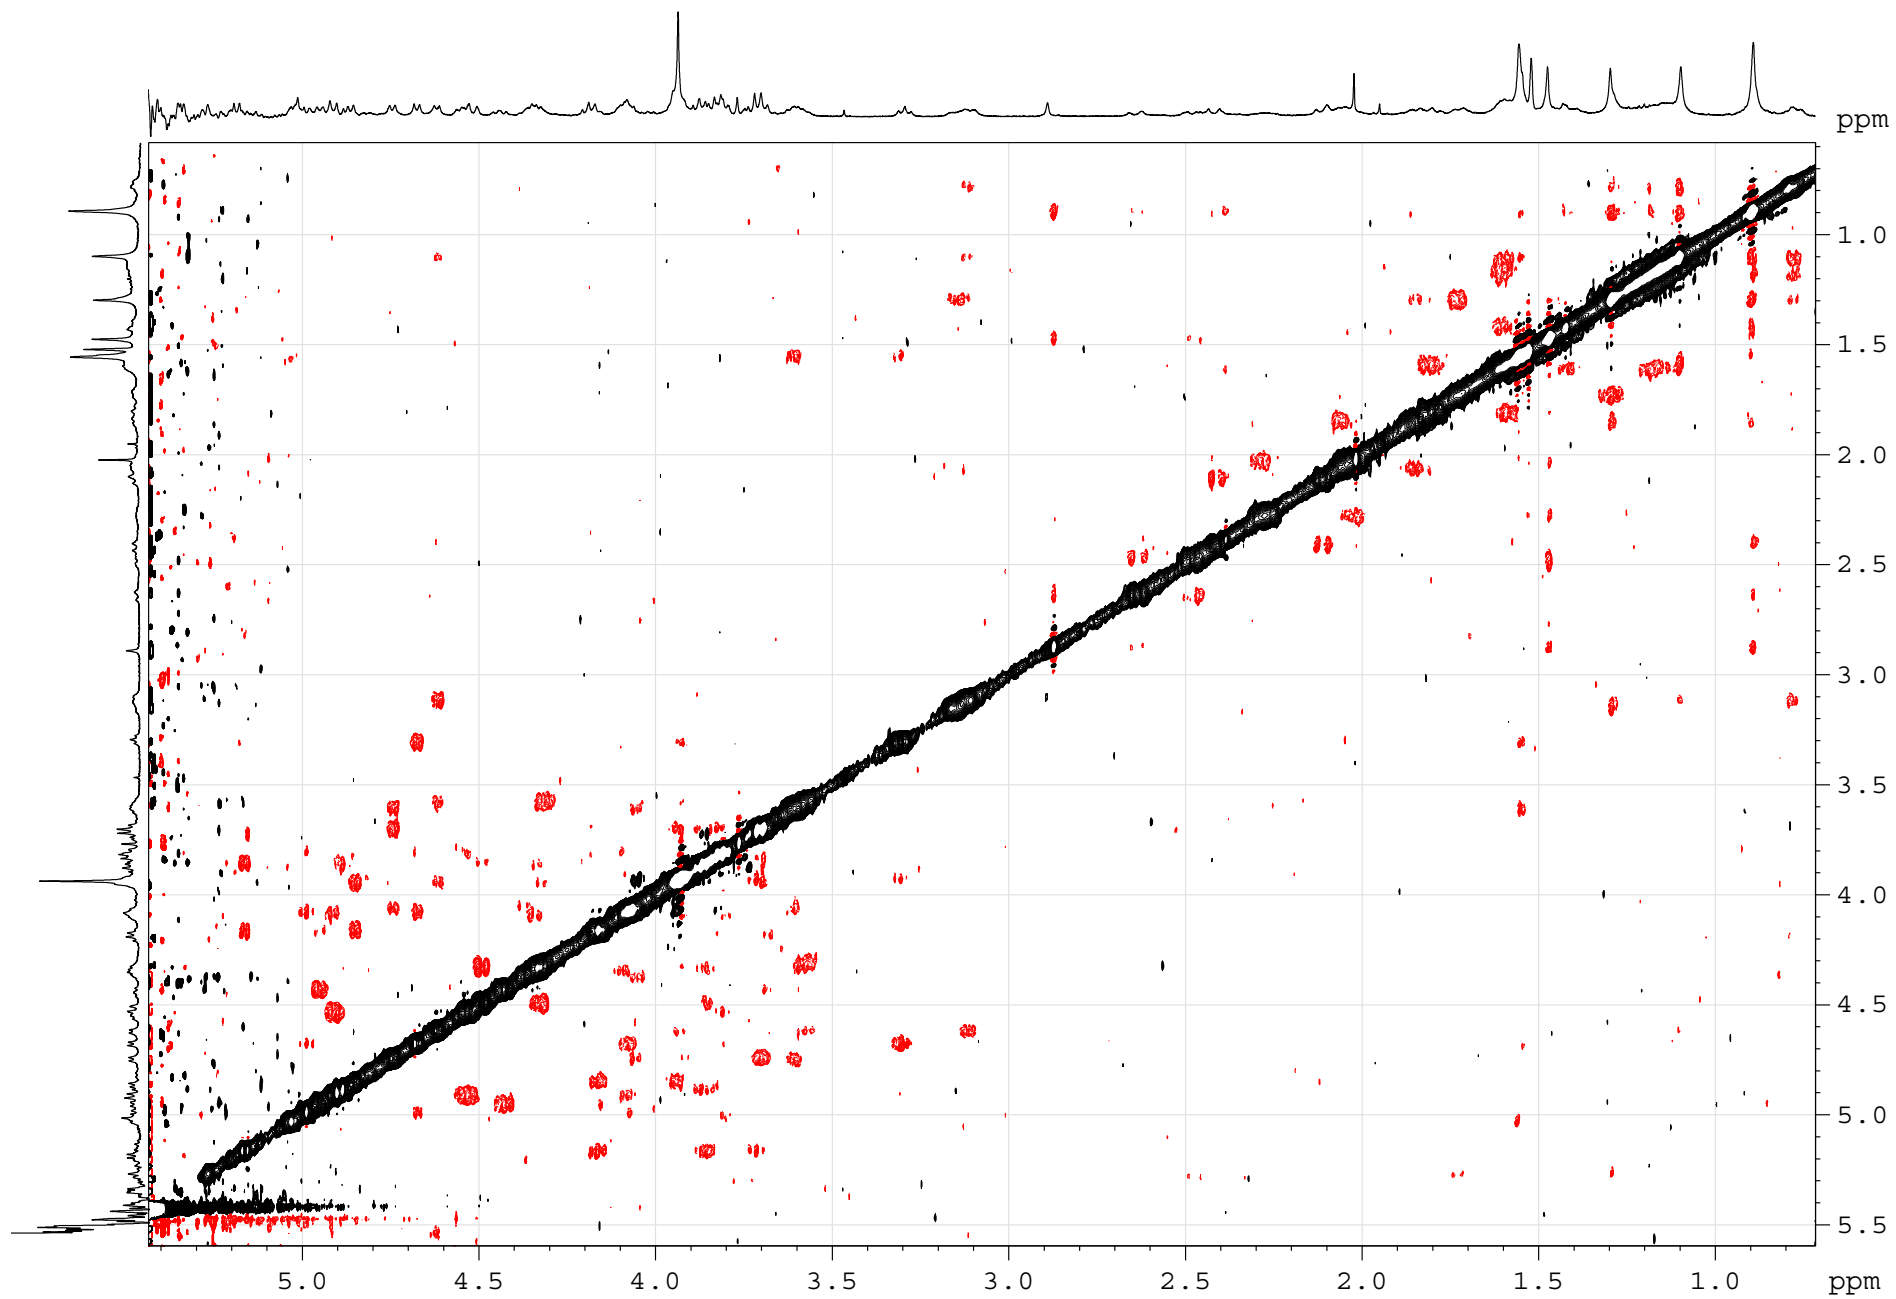

Figure S5. The ROESY (500.12 MHz) spectrum of chilensoside E (1) in  $C_5D_5N/D_2O$  (4/1)

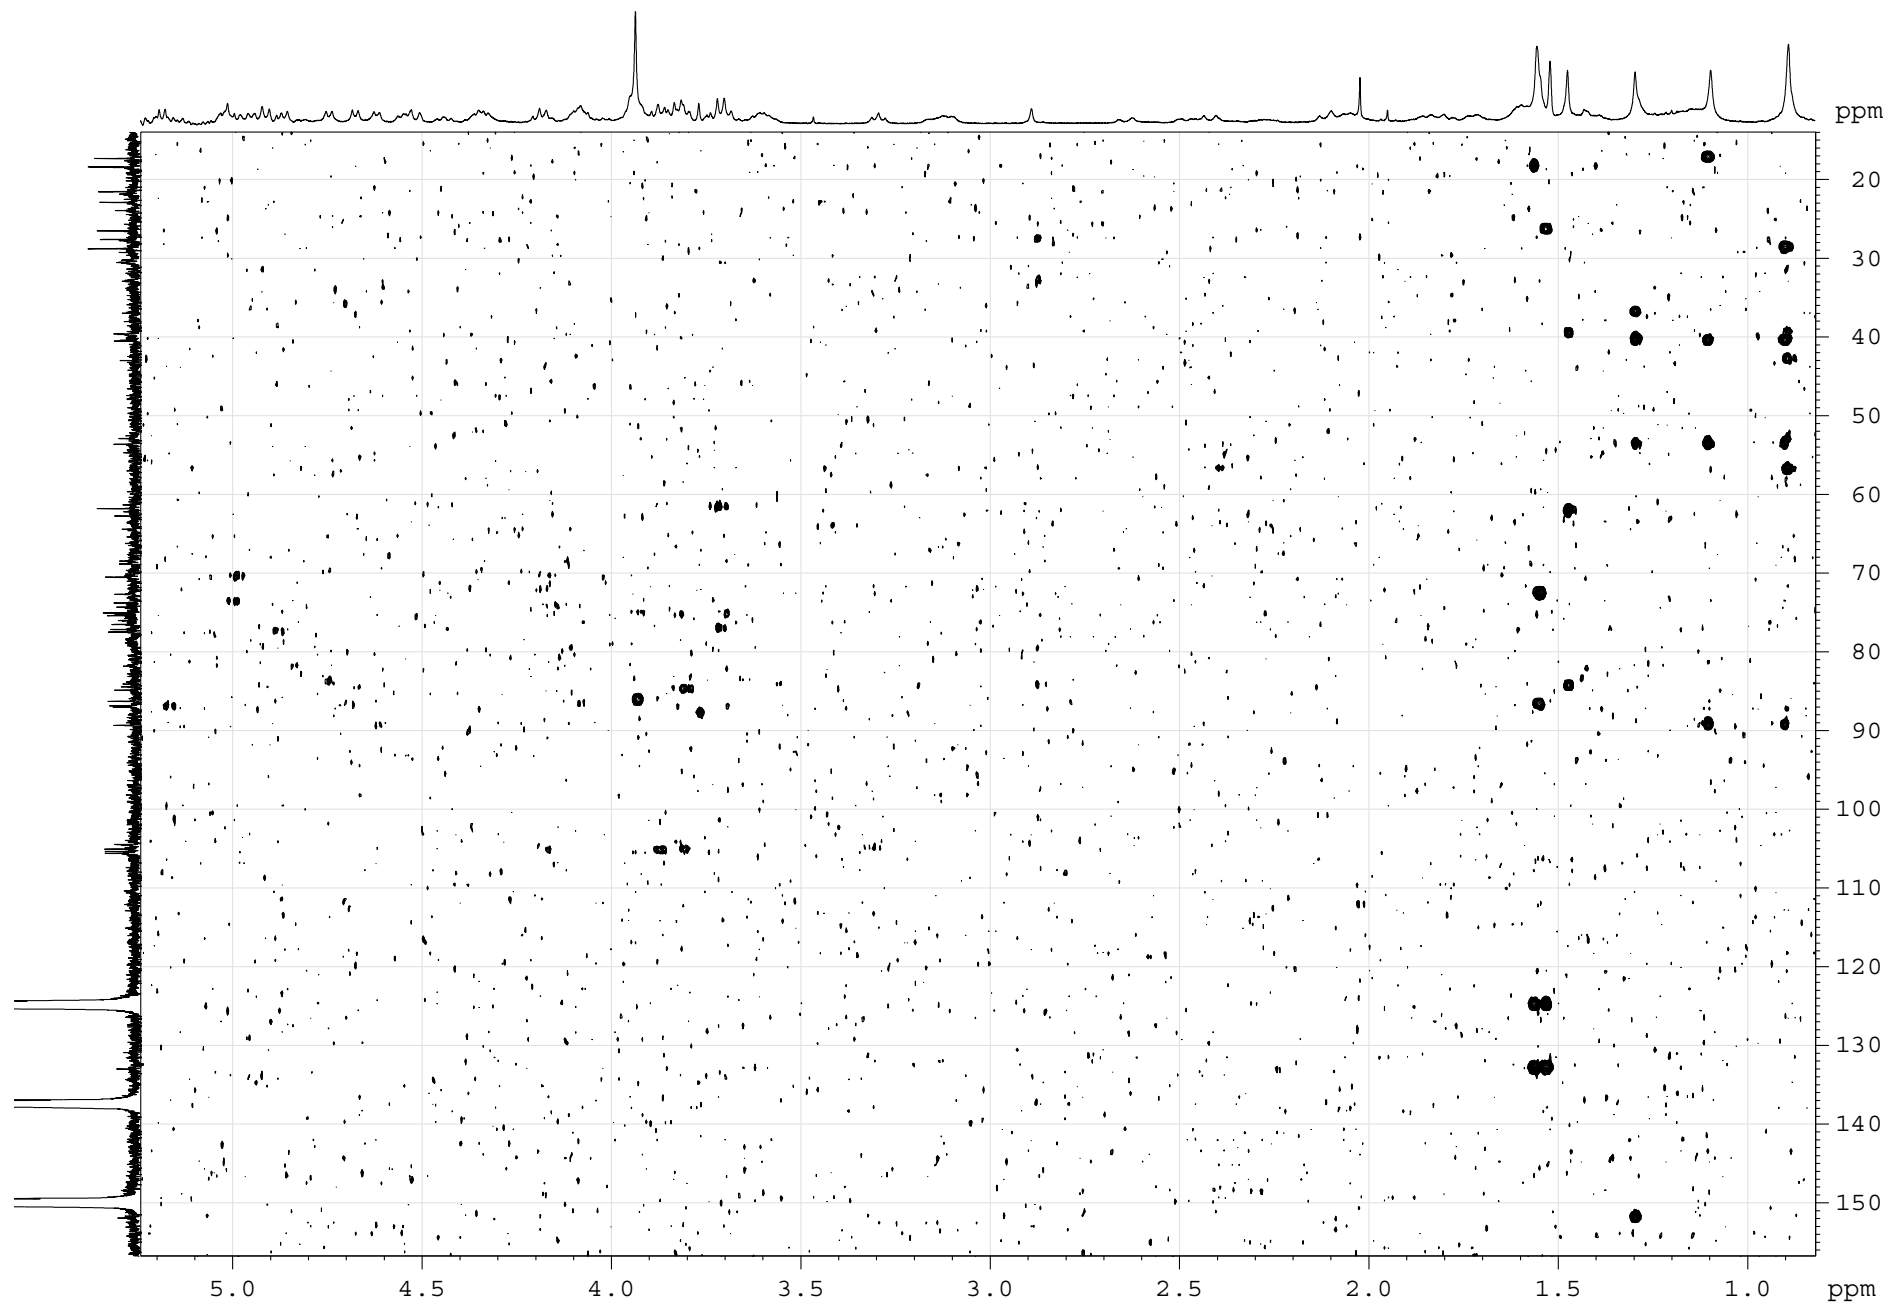

Figure S6. The HMBC (500.12 MHz) spectrum of chilensoside E (**1**) in  $\text{C}_5\text{D}_5\text{N}/\text{D}_2\text{O}$  (4/1)



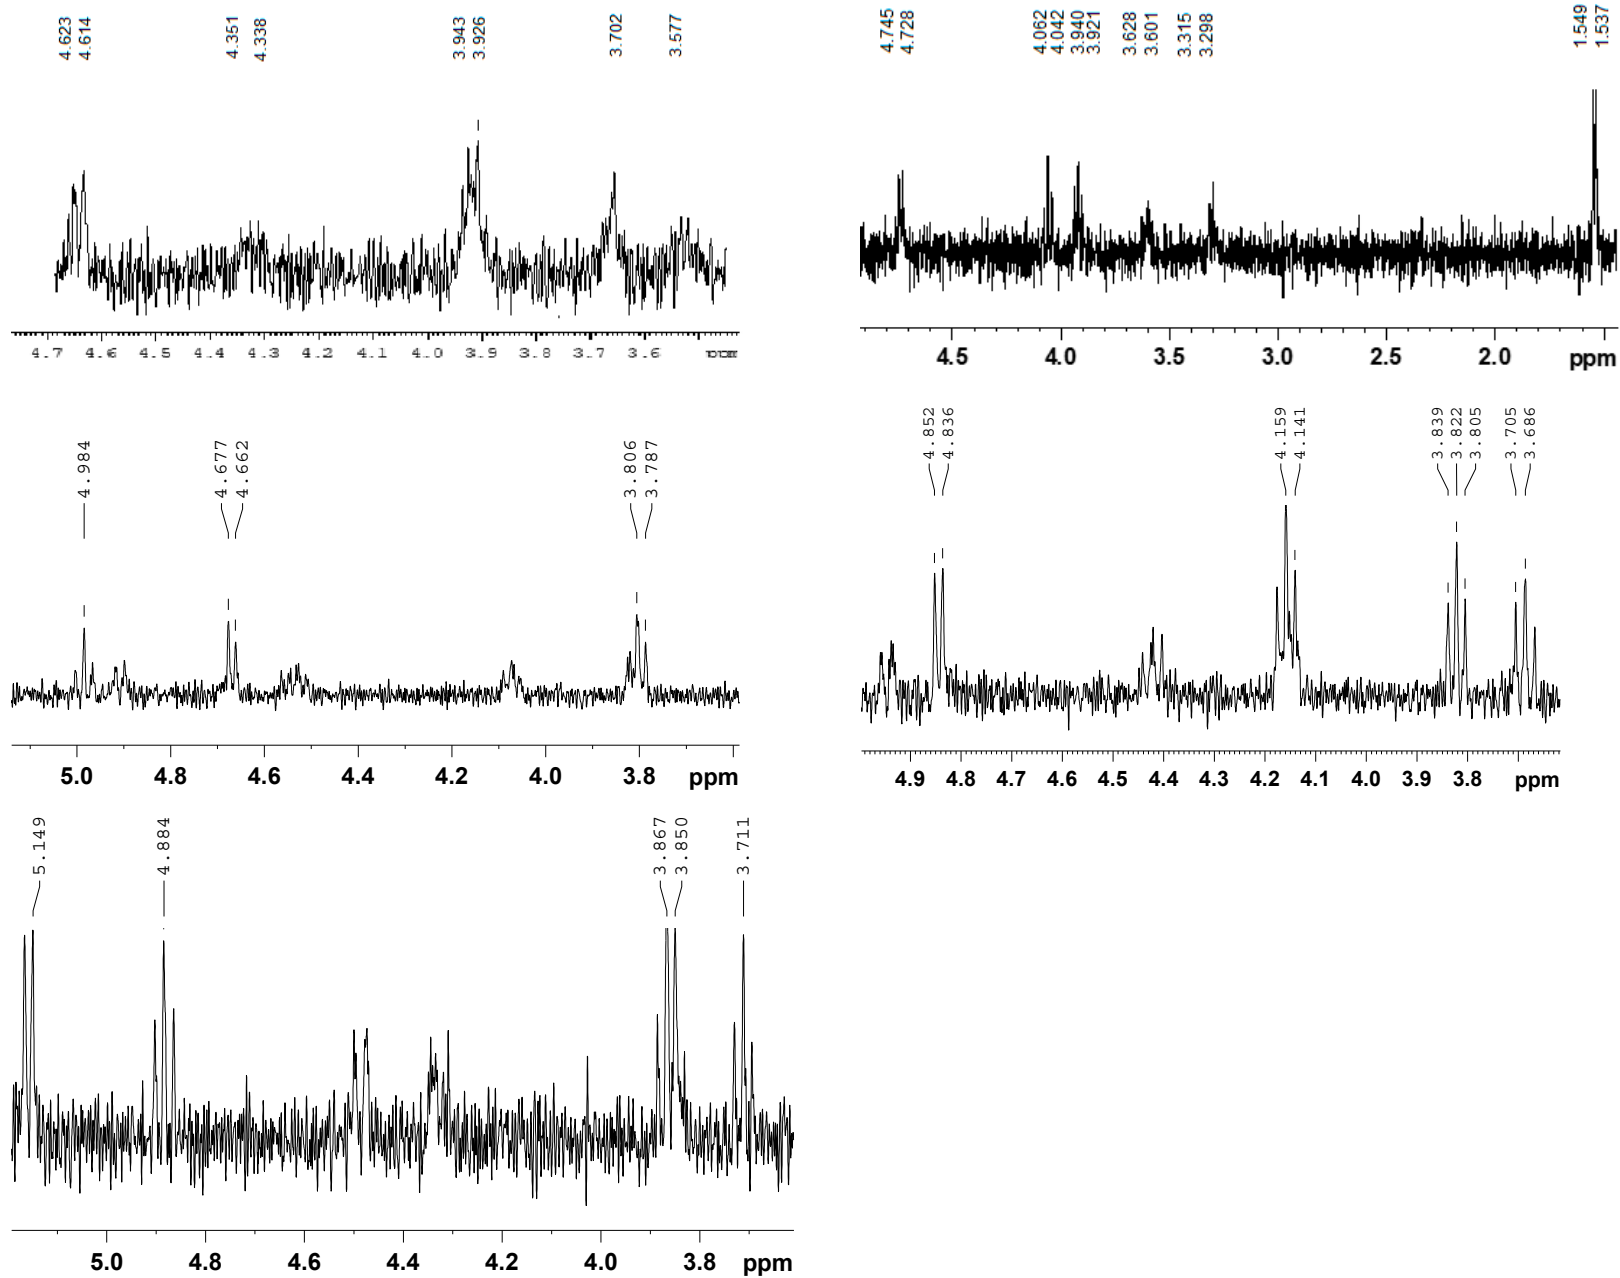

Figure S7. 1 D TOCSY (700.13 MHz) spectra of Xyl1, Qui2, Glc3, Glc4, MeGlc5 of chilenoside E (**1**) in C<sub>5</sub>D<sub>5</sub>N/D<sub>2</sub>O (4/1)

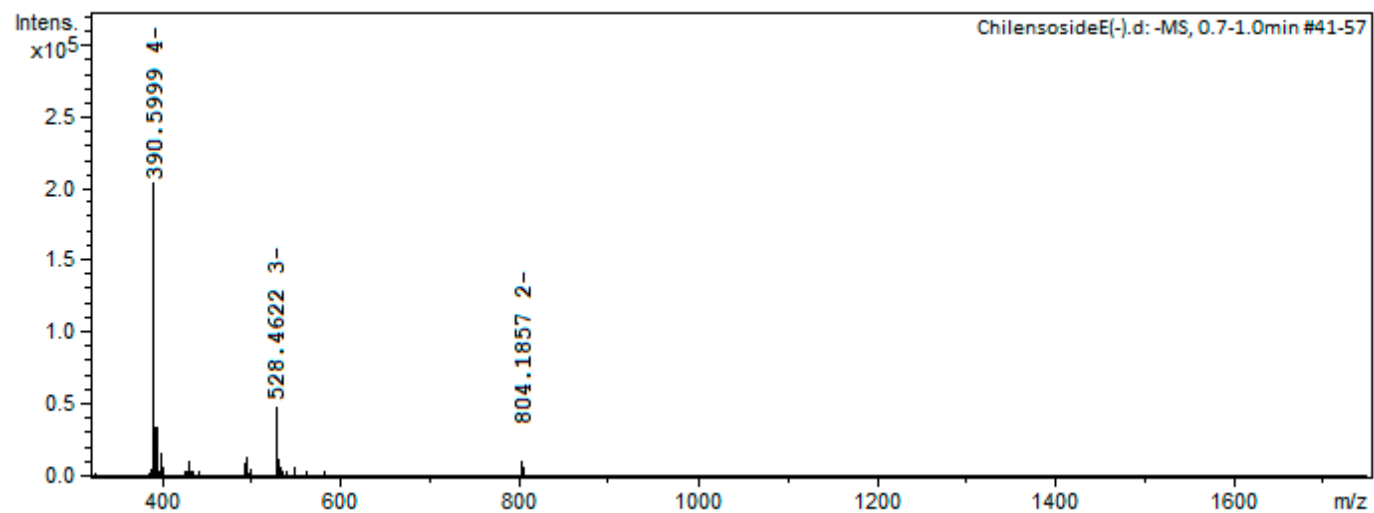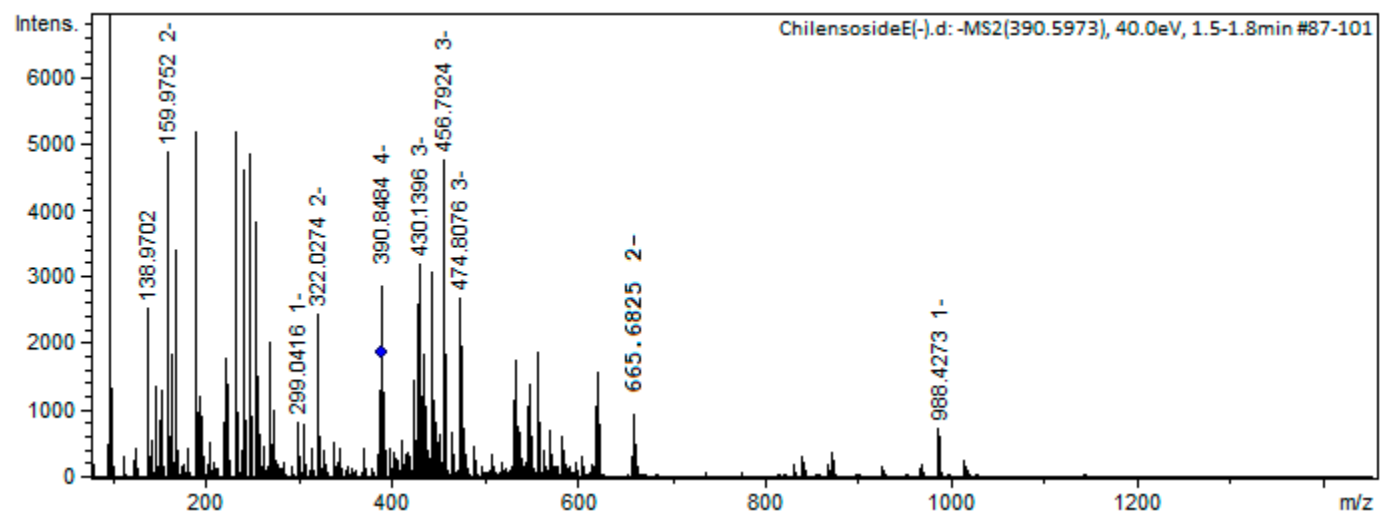

Figure S8. HR-ESI-MS and ESI-MS/MS spectra of chilensoside E (1)

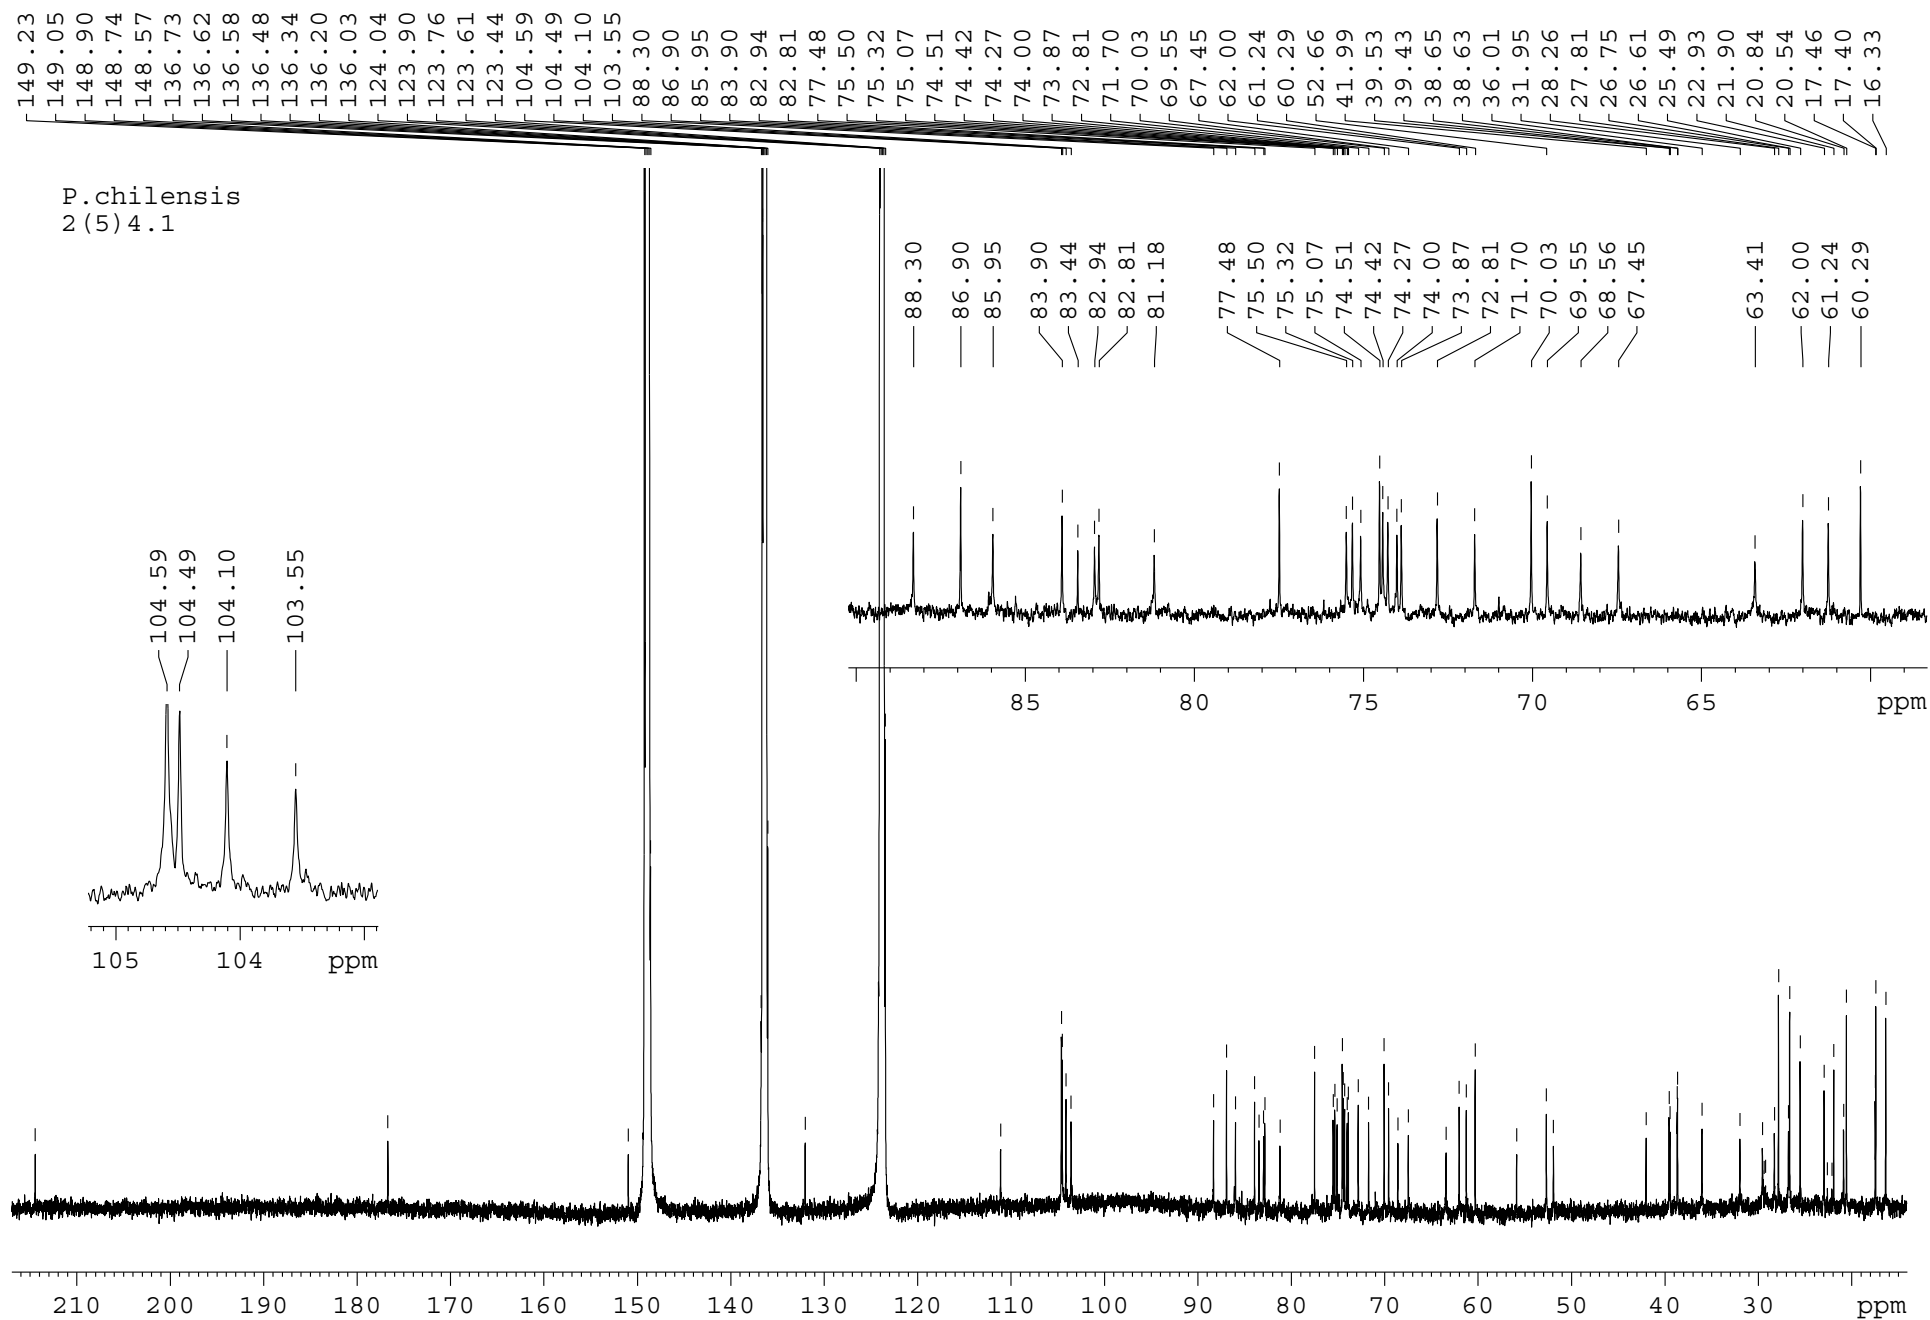

Figure S9. The  $^{13}\text{C}$  NMR (125.67 MHz) spectrum of chilensoside F (**2**) in  $\text{C}_5\text{D}_5\text{N}/\text{D}_2\text{O}$  (4/1)

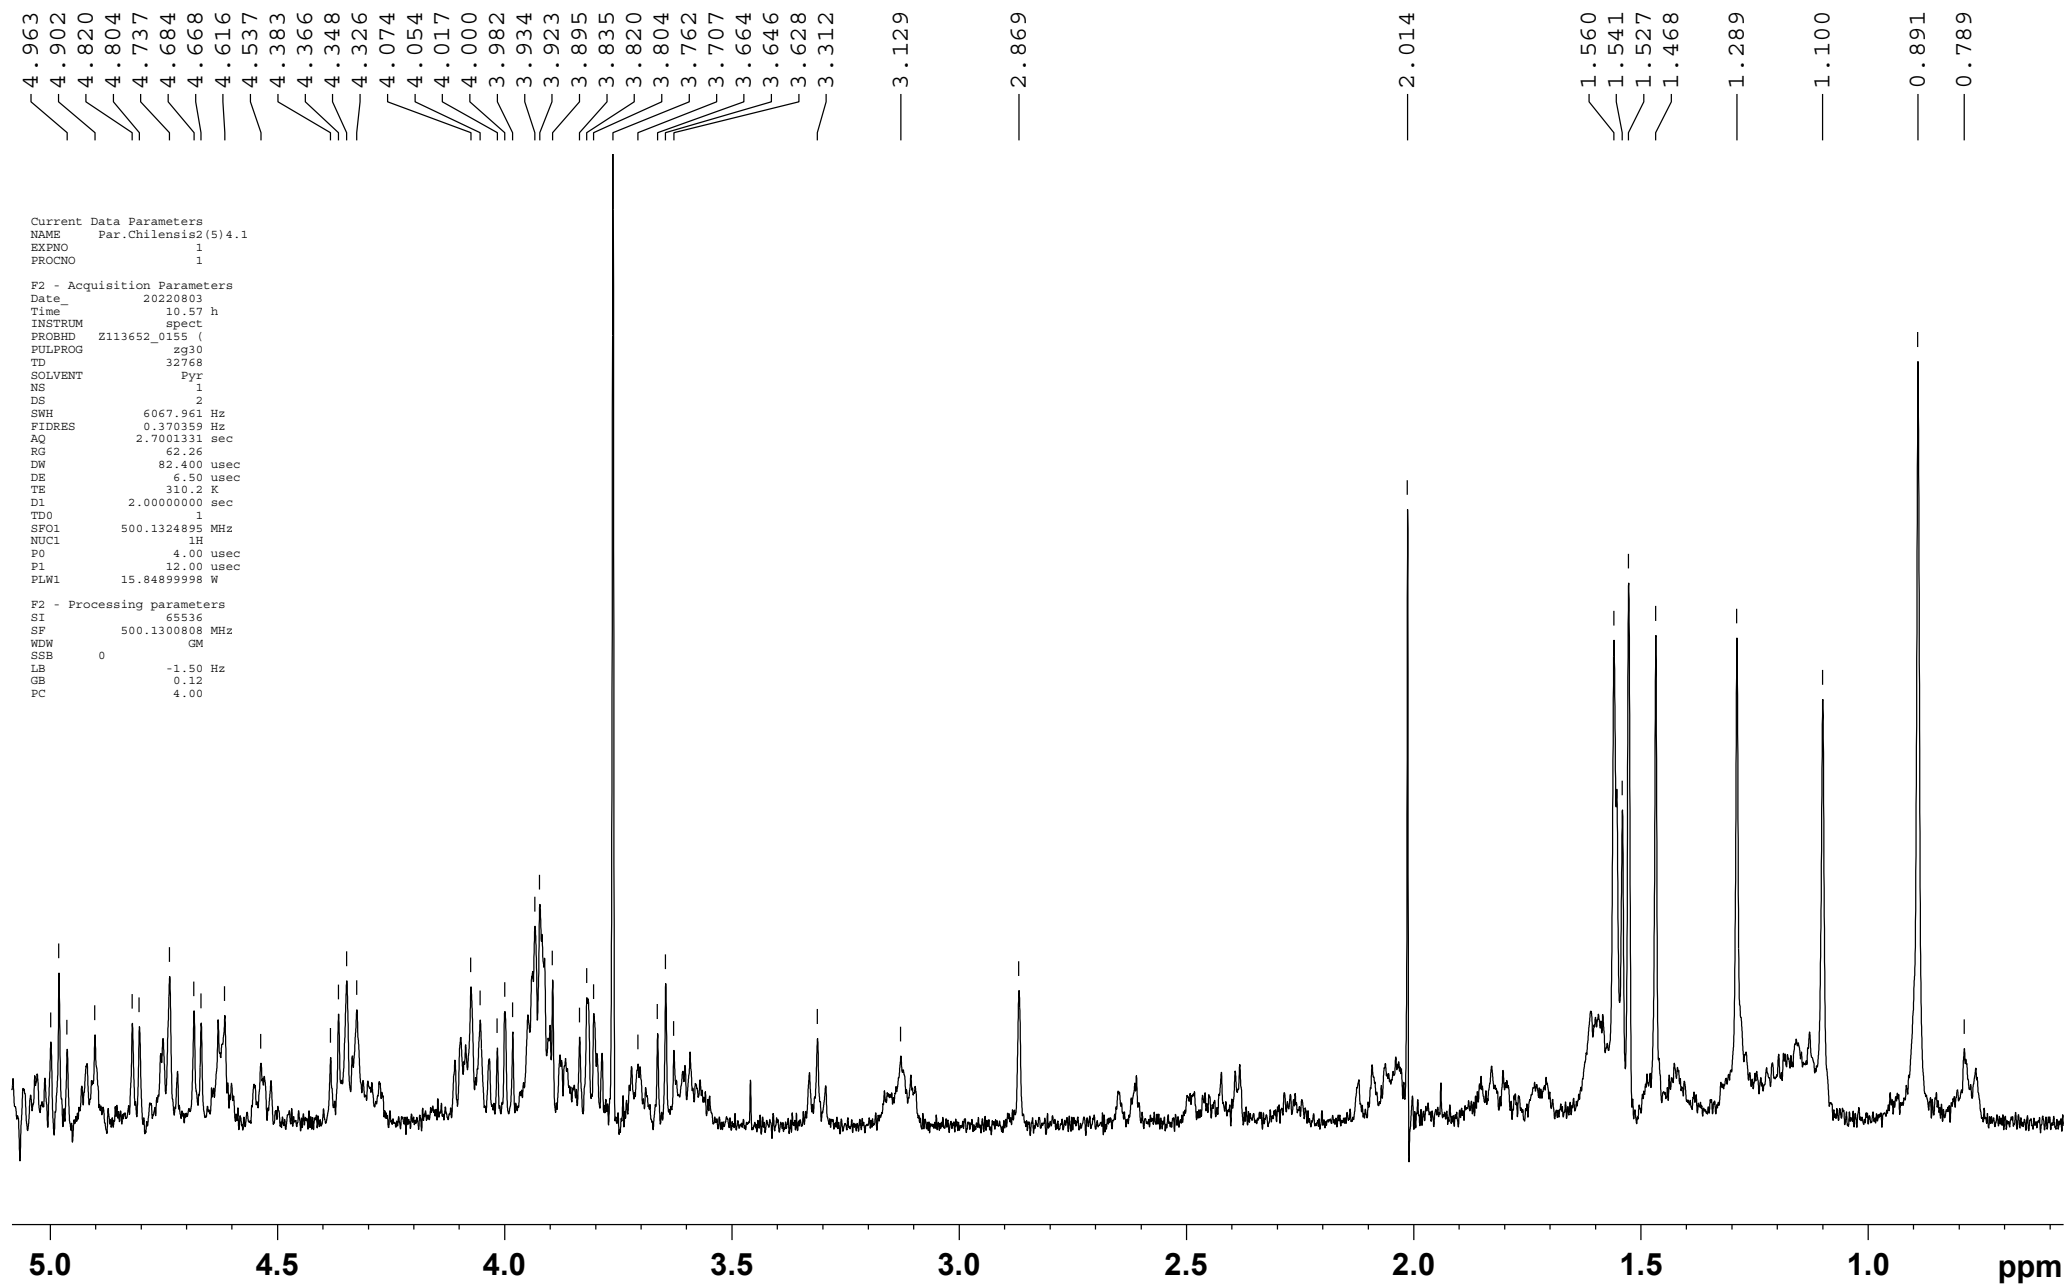

Figure S10. The  $^1\text{H}$  NMR (500.12 MHz) spectrum of chilensoside F (**2**) in  $\text{C}_5\text{D}_5\text{N}/\text{D}_2\text{O}$  (4/1)

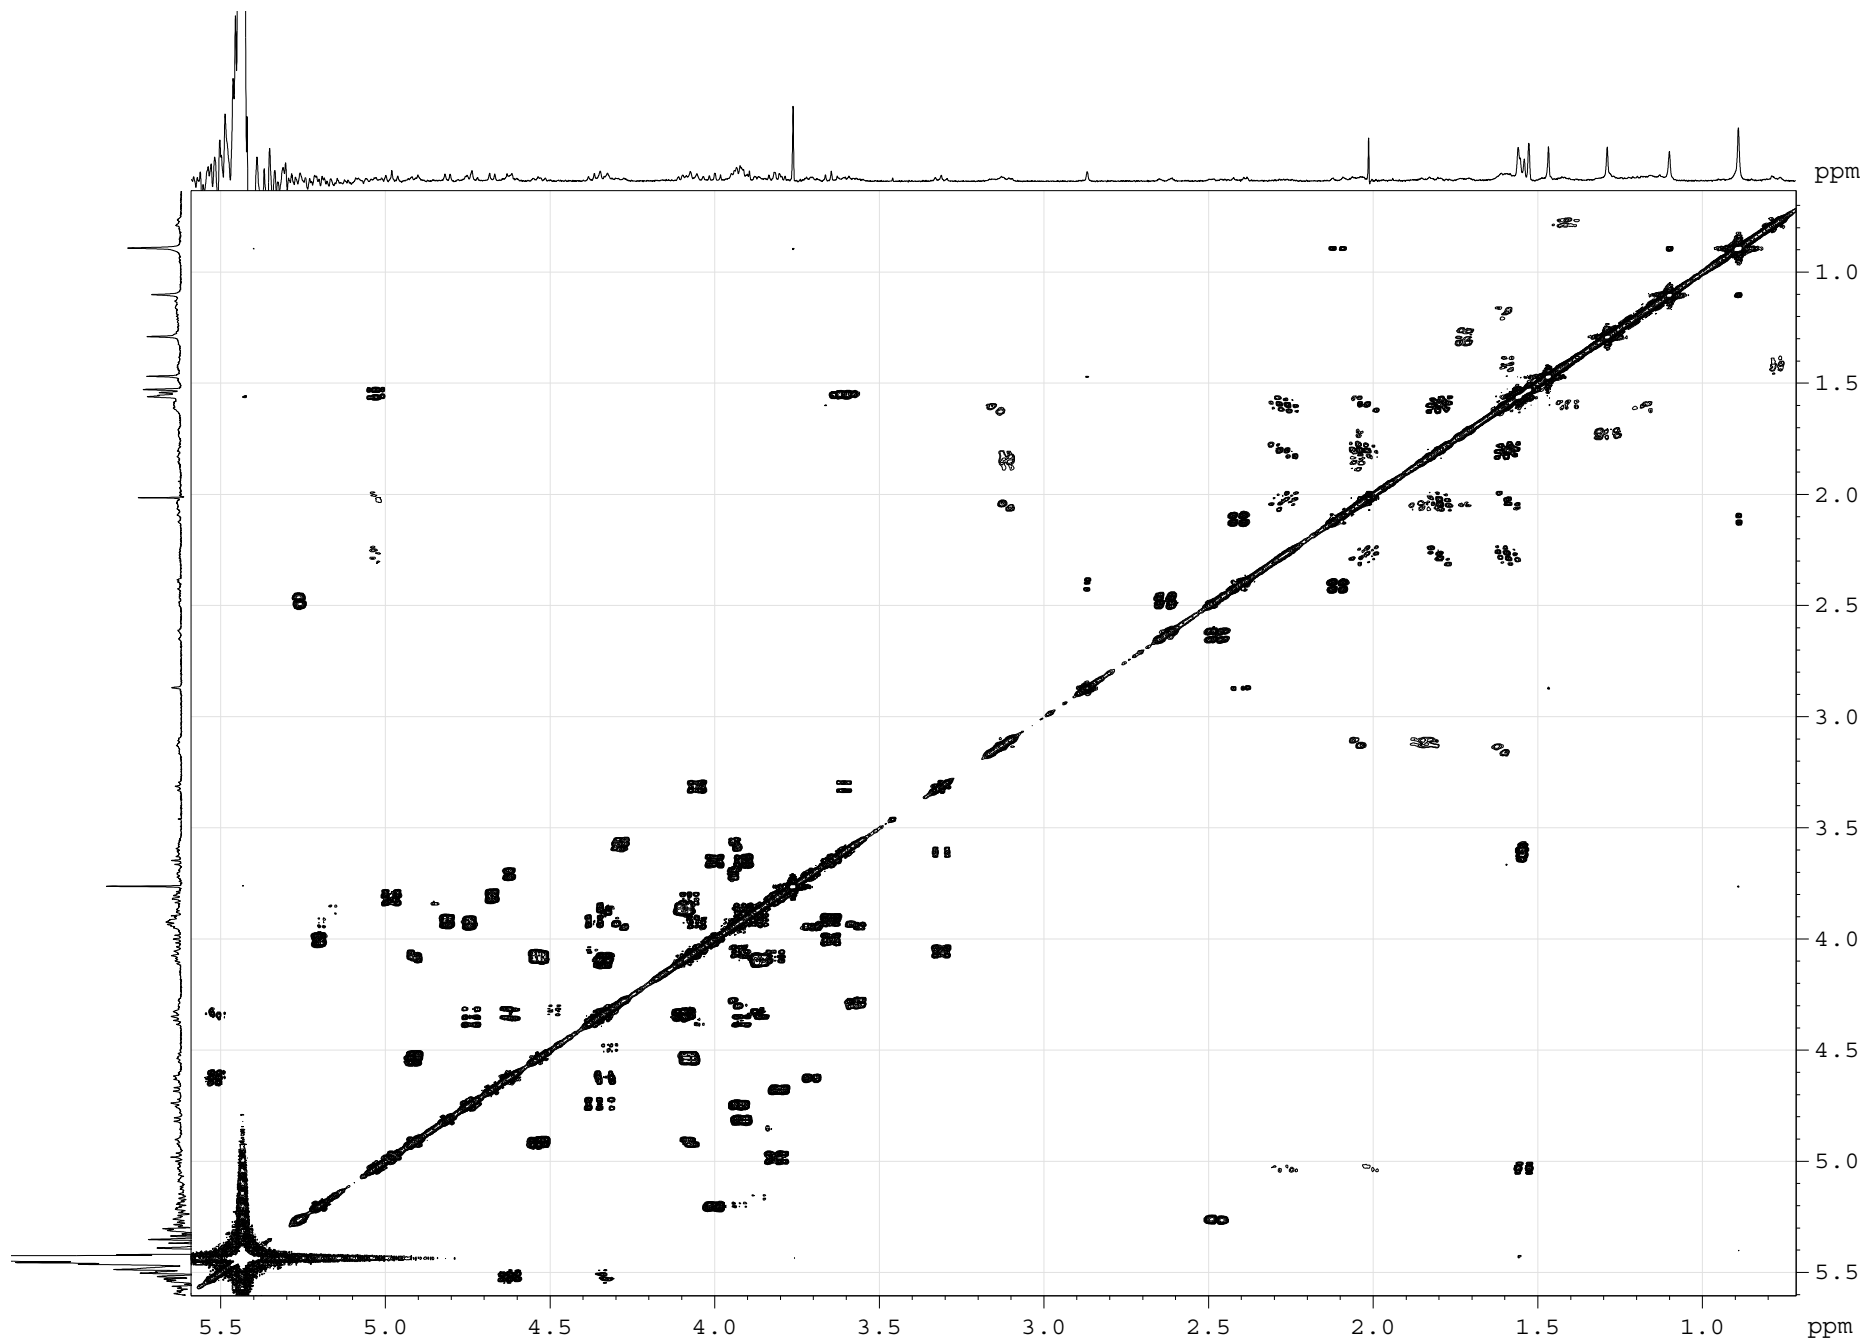

Figure S11. The COSY (500.12 MHz) spectrum of chilensoside F (2) in  $C_5D_5N/D_2O$  (4/1)

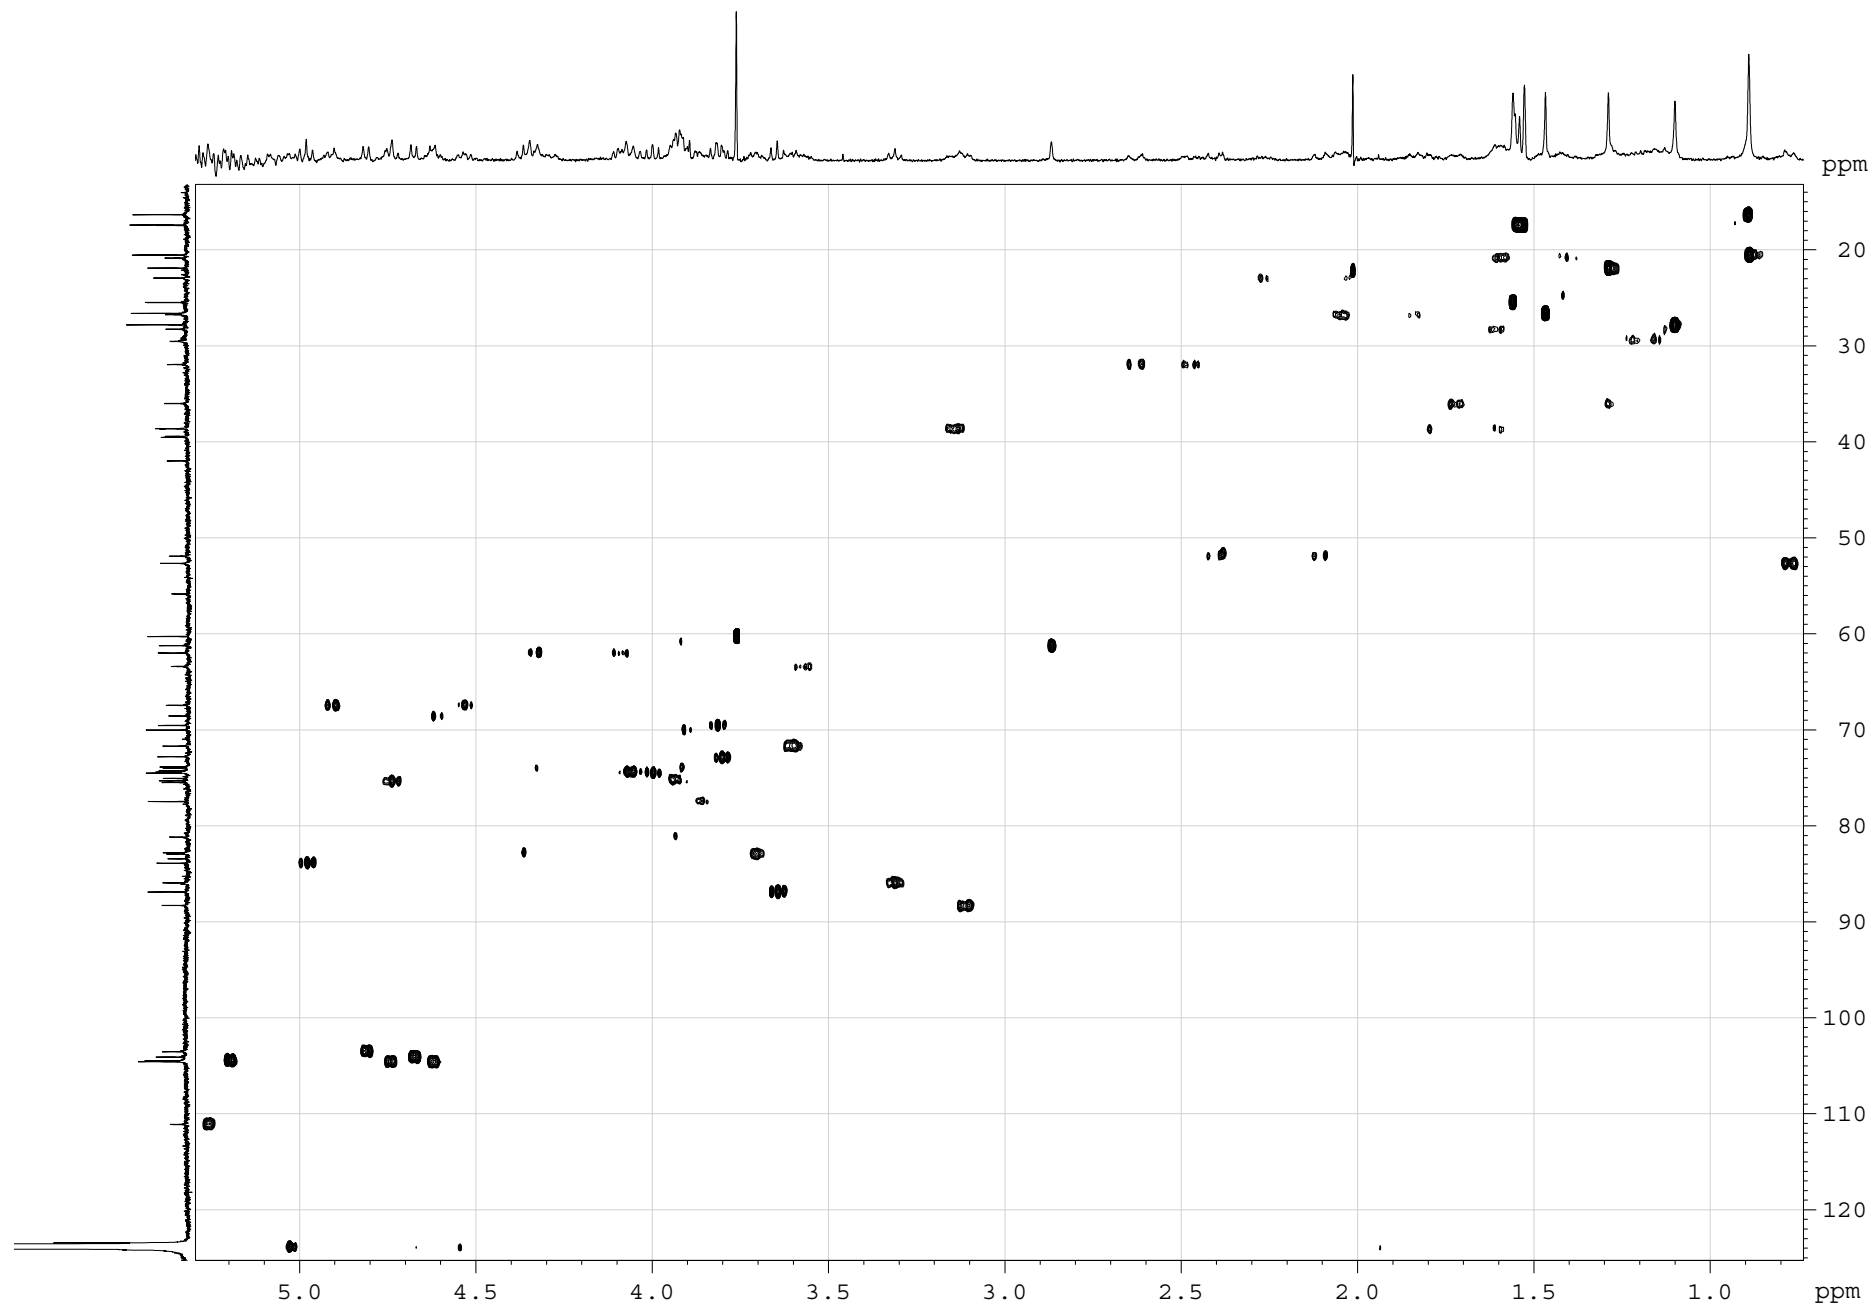

Figure S12. The HSQC (500.12 MHz) spectrum of chilensoside F (2) in  $\text{C}_5\text{D}_5\text{N}/\text{D}_2\text{O}$  (4/1)

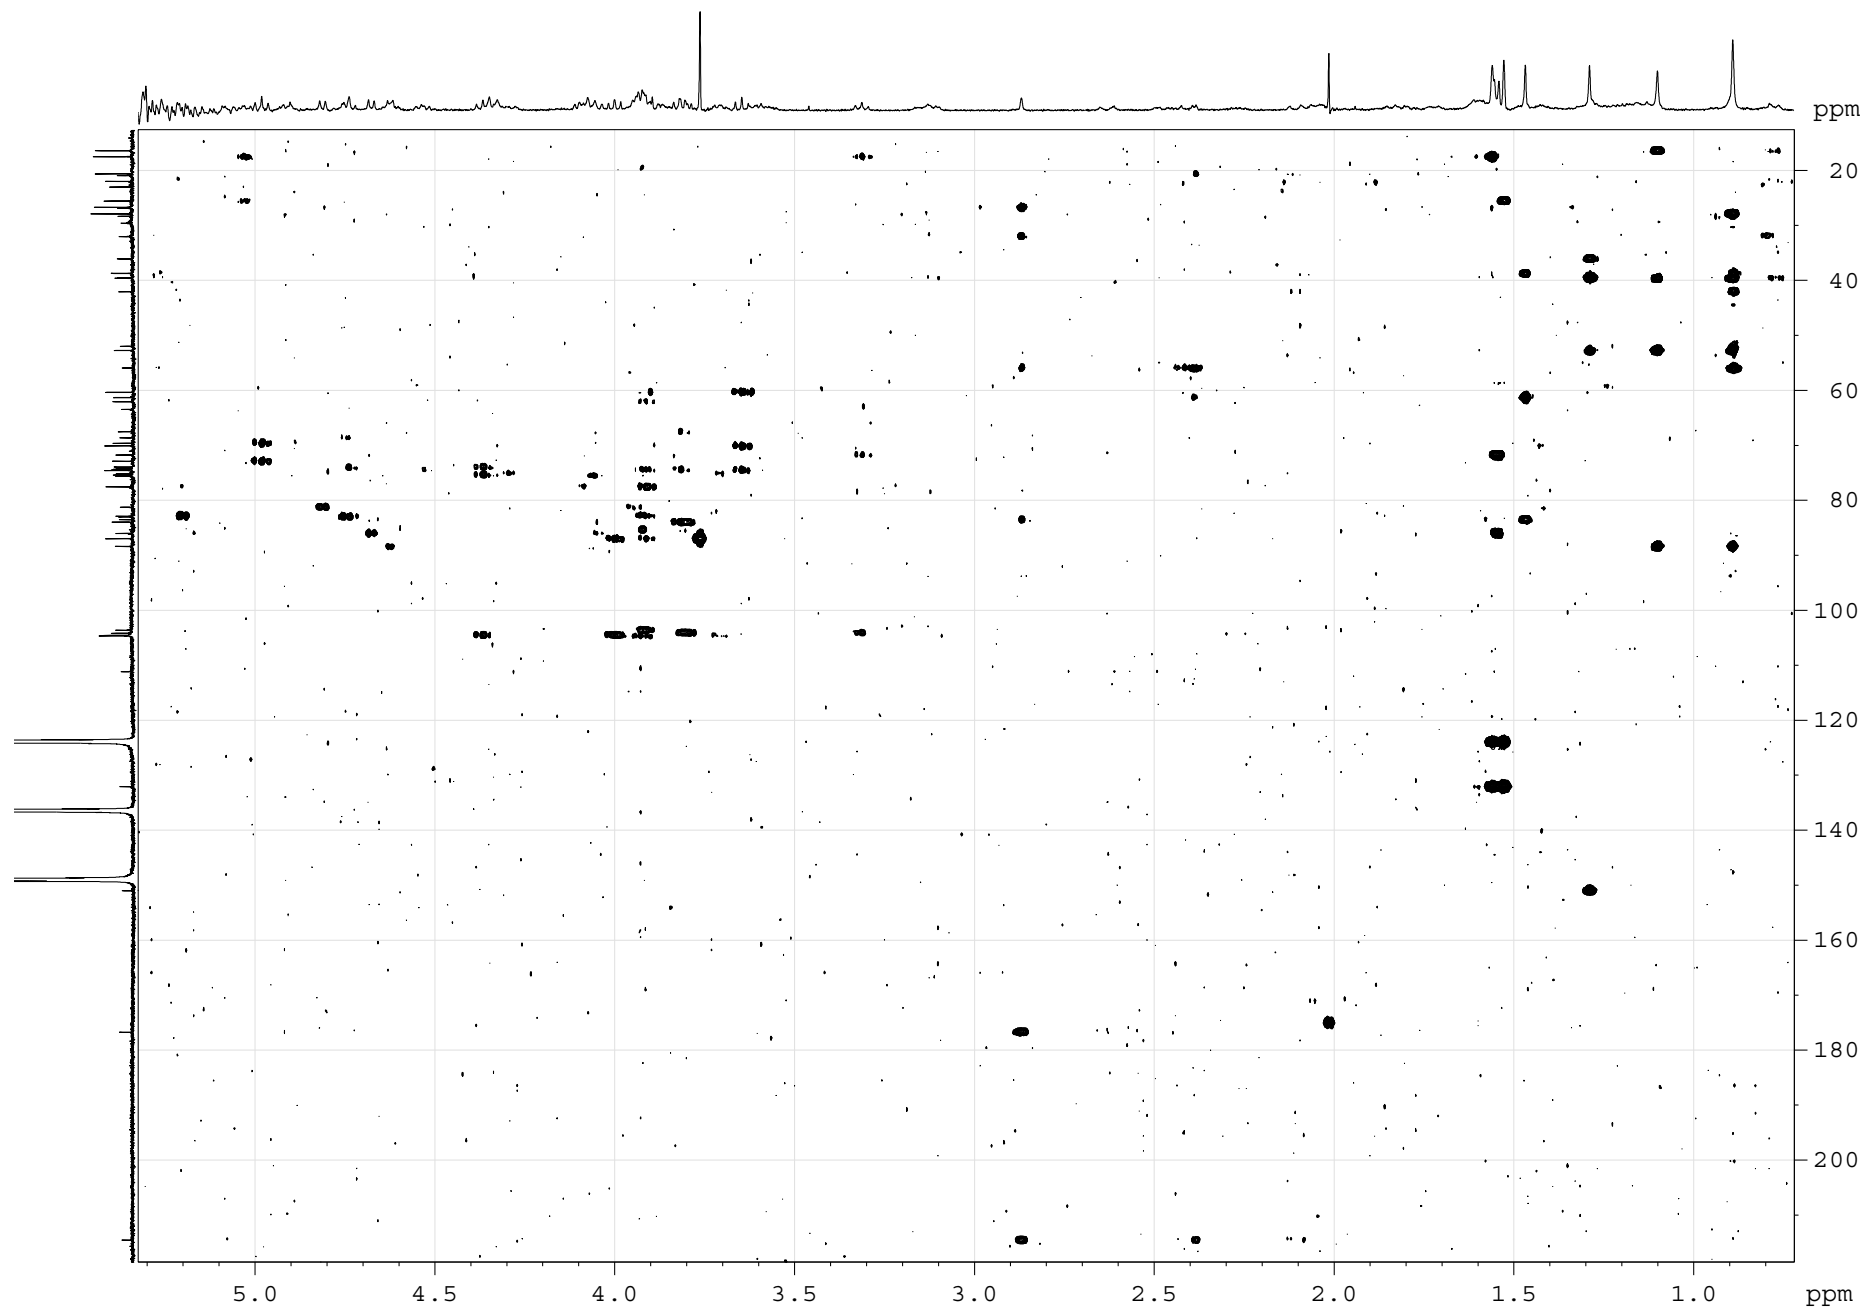

Figure S13. The HMBC (500.12 MHz) spectrum of chilensoside F (**2**) in C<sub>5</sub>D<sub>5</sub>N/D<sub>2</sub>O (4/1)

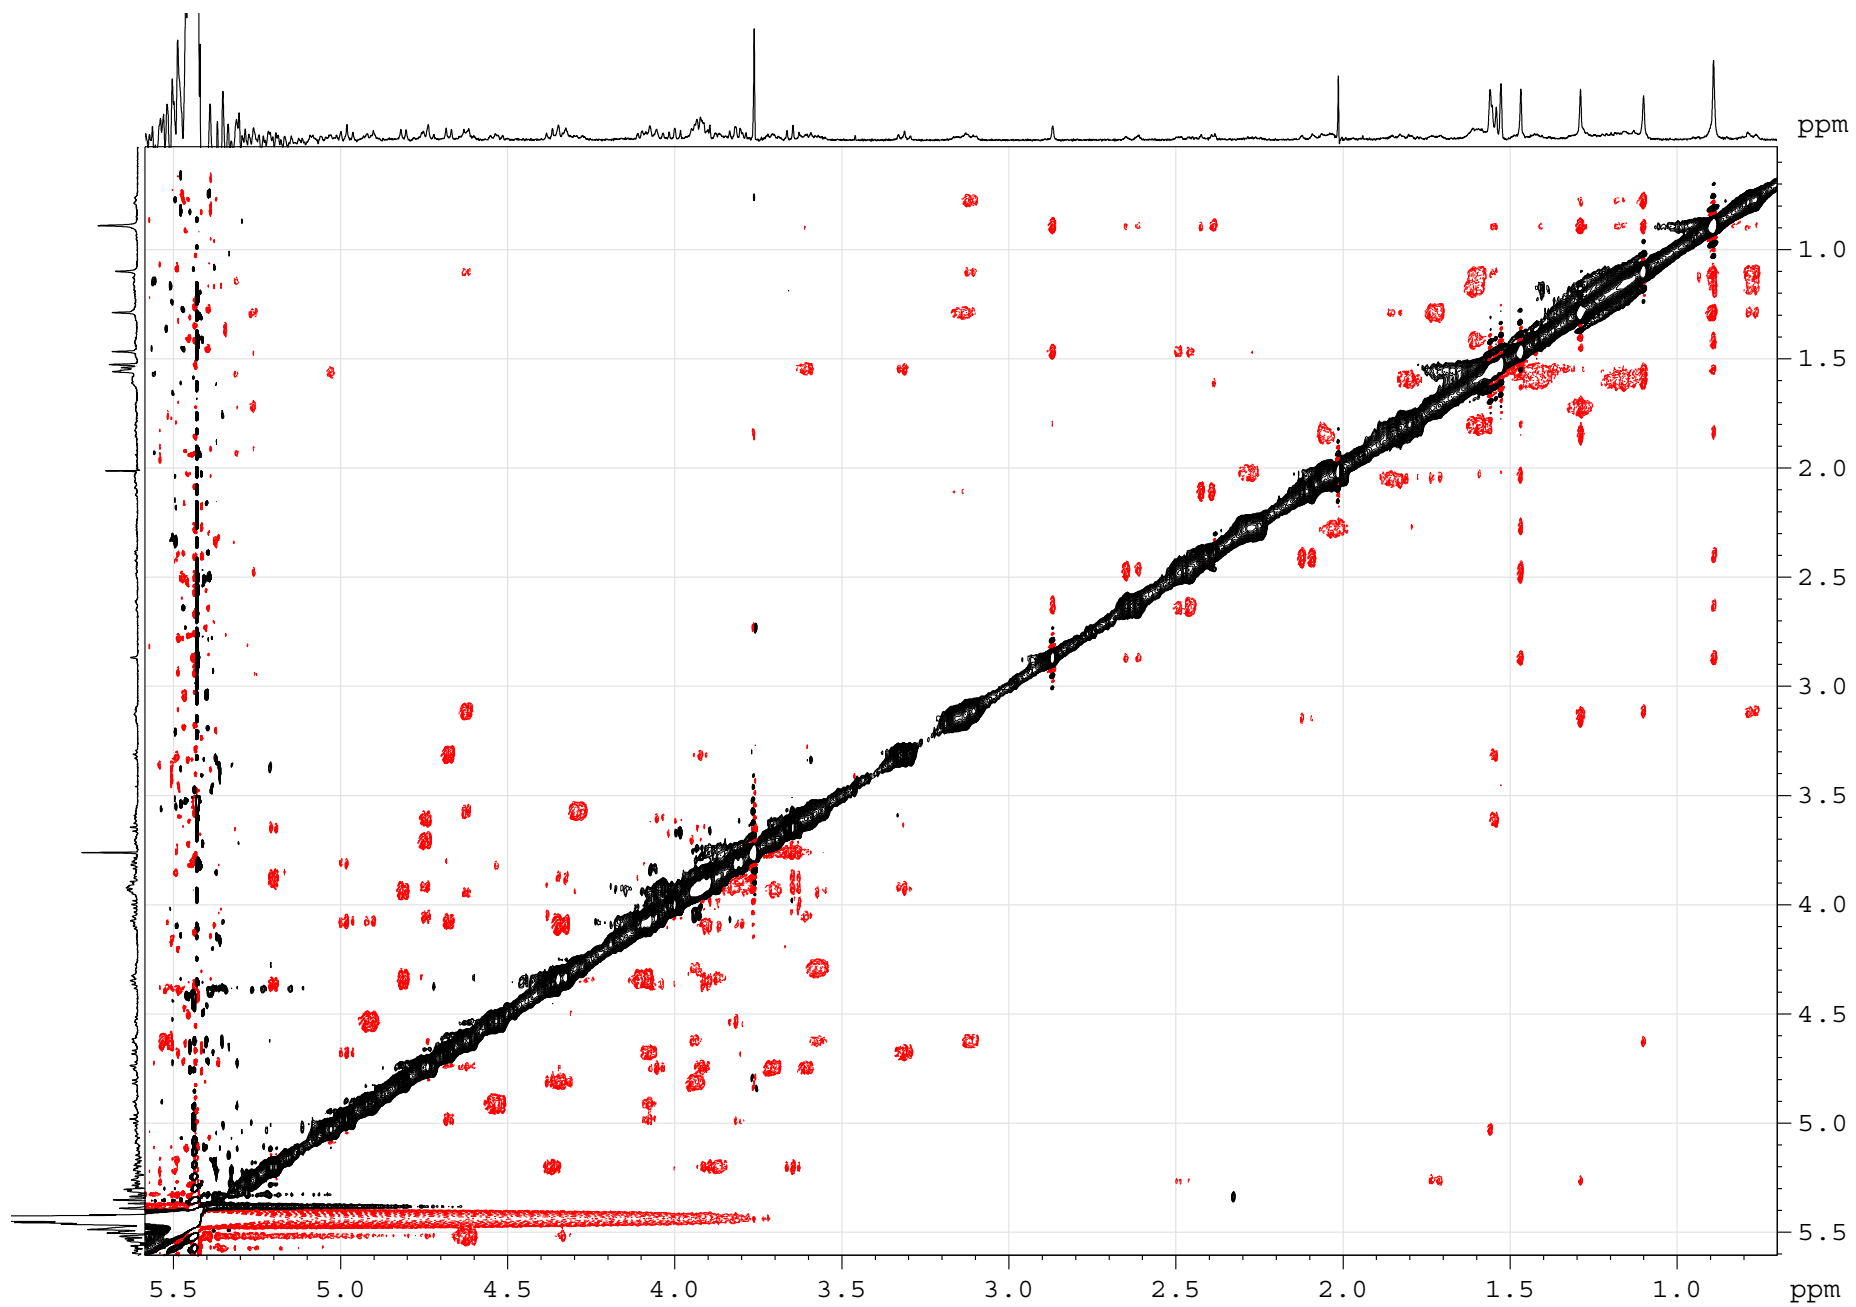

Figure S14. The ROESY (500.12 MHz) spectrum of chilensoside F (**2**) in C<sub>5</sub>D<sub>5</sub>N/D<sub>2</sub>O (4/1)



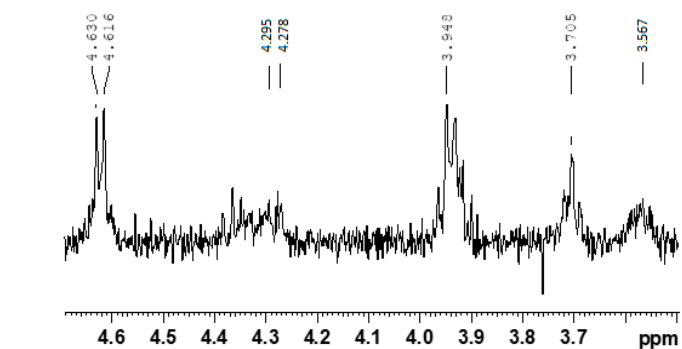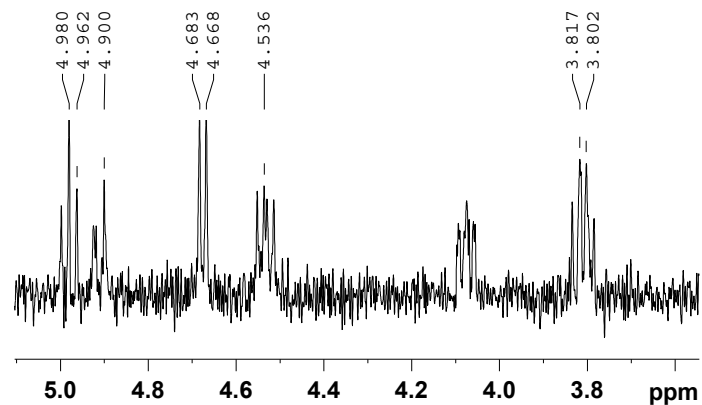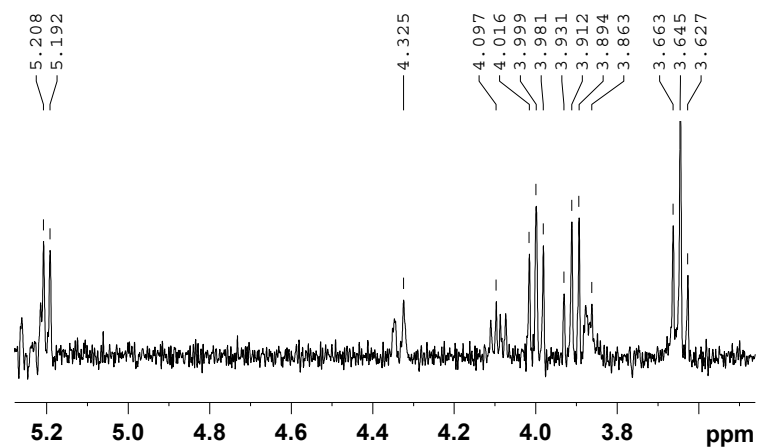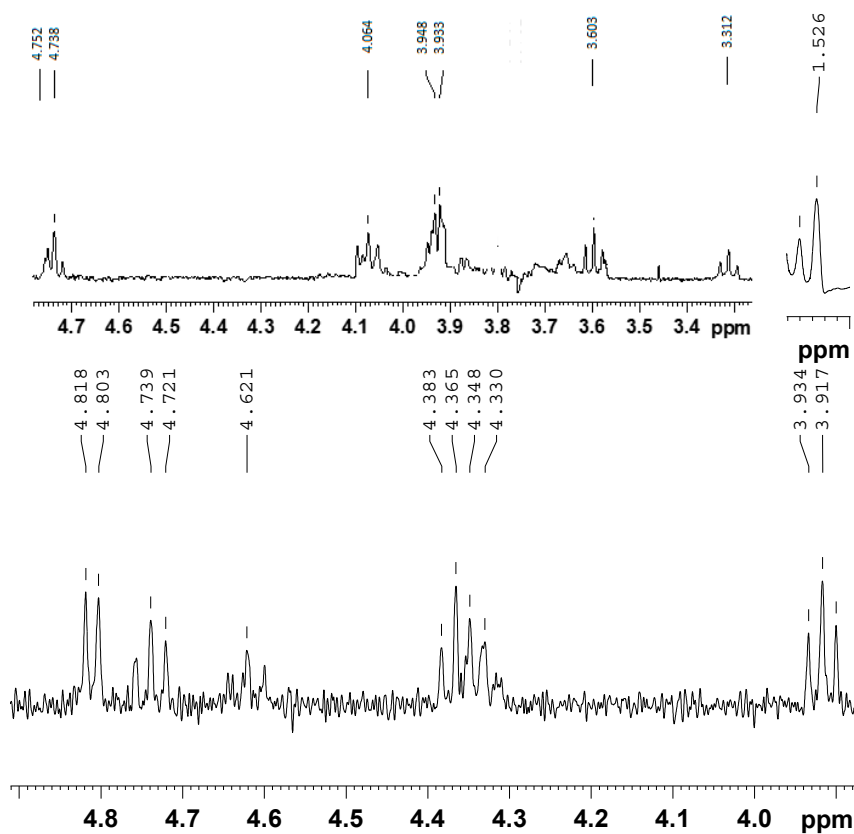

Figure S15. 1D TOCSY (500.12 MHz) spectra of Xyl1, Qui2, Glc3, Glc4, MeGlc5 of chilensoside F (2) in C<sub>5</sub>D<sub>5</sub>N/D<sub>2</sub>O (4/1)

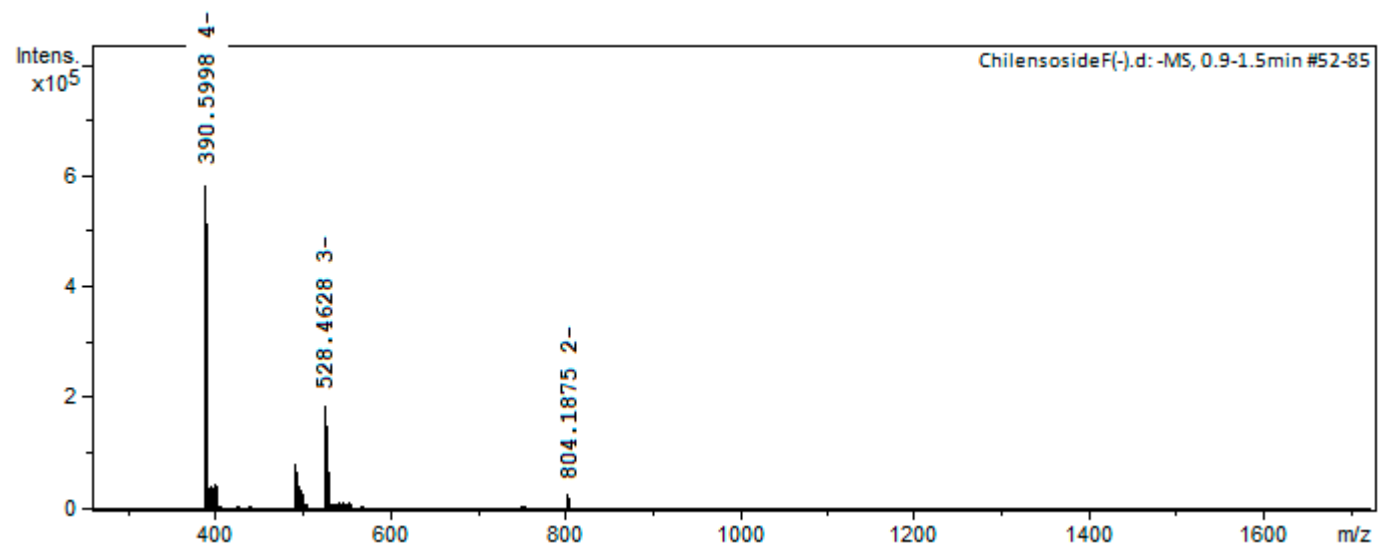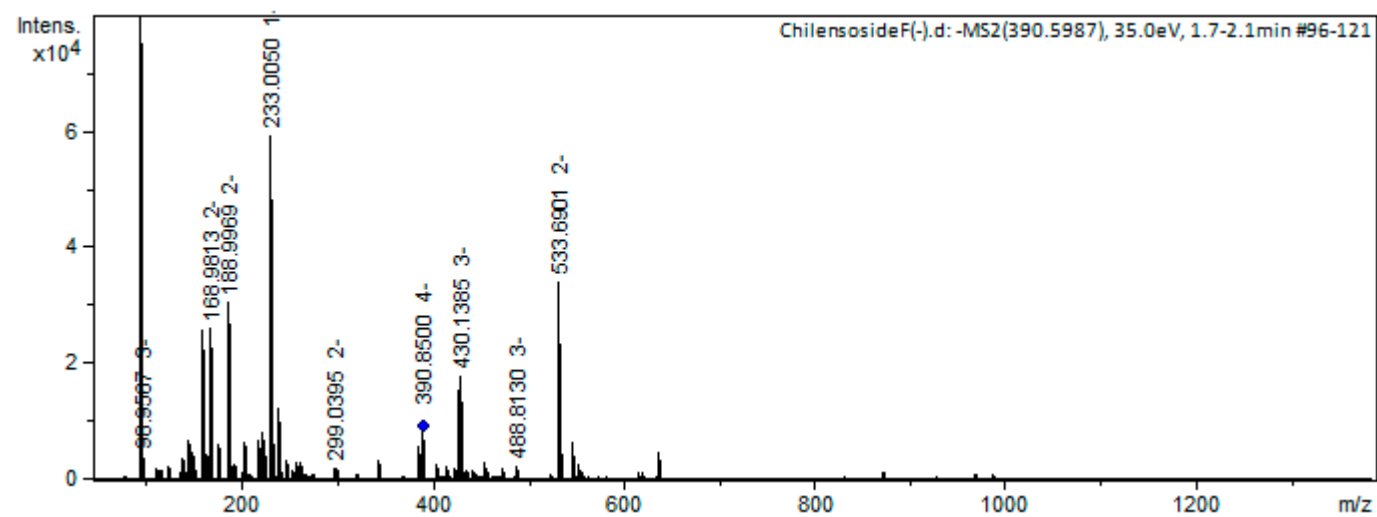

Figure S16. HR-ESI-MS and ESI-MS/MS spectra of chilensoside F (2)

**Table S1.** <sup>13</sup>C and <sup>1</sup>H NMR chemical shifts, HMBC and ROESY correlations of the aglycone moiety of chilensoside F (2).

| Position | $\delta_{\text{mult.}}^{\text{a}}$ | $\delta_{\text{Hmult.}} (J \text{ in Hz})^{\text{b}}$ | HMBC                               | ROESY                   |
|----------|------------------------------------|-------------------------------------------------------|------------------------------------|-------------------------|
| 1        | 36.0 CH <sub>2</sub>               | 1.72 m<br>1.29 m                                      |                                    | H-11<br>H-3             |
| 2        | 26.7 CH <sub>2</sub>               | 2.04 m<br>1.83 m                                      |                                    | H-19, H-30              |
| 3        | 88.3 CH                            | 3.12 dd (4.6; 11.8)                                   |                                    | H-1, H-5, H-31, H1-Xyl1 |
| 4        | 39.4 C                             |                                                       |                                    |                         |
| 5        | 52.6 CH                            | 0.77 brd (11.8)                                       | C: 4, 19, 30                       | H-1, H-3, H-7           |
| 6        | 20.8 CH <sub>2</sub>               | 1.59 m<br>1.41 m                                      |                                    | H-8, H-30               |
| 7        | 28.2 CH <sub>2</sub>               | 1.61 m<br>1.13 m                                      |                                    | H-15<br>H-5, H-32       |
| 8        | 38.6 CH                            | 3.14 m                                                |                                    | H-6                     |
| 9        | 151.1 C                            |                                                       |                                    |                         |
| 10       | 39.5 C                             |                                                       |                                    |                         |
| 11       | 111.1 CH                           | 5.28 brs                                              | C: 10, 13                          | H-1                     |
| 12       | 31.9 CH <sub>2</sub>               | 2.63 brd (16.5)<br>2.47 dd (5.9; 16.5)                | C: 11, 18<br>C: 11, 14             | H-17                    |
| 13       | 55.8 C                             |                                                       |                                    |                         |
| 14       | 42.0 C                             |                                                       |                                    |                         |
| 15       | 51.9 CH <sub>2</sub>               | 2.40 d (16.0)<br>2.11 d (16.0)                        | C: 13, 16, 17, 32<br>C: 14, 16, 32 | H-8                     |
| 16       | 214.4 C                            |                                                       |                                    |                         |
| 17       | 61.2 CH                            | 2.89 s                                                | C: 12, 13, 16, 18, 20, 21          | H-12, H-23, H-32        |
| 18       | 176.7 C                            |                                                       |                                    |                         |
| 19       | 21.9 CH <sub>3</sub>               | 1.29 s                                                | C: 1, 5, 9, 10                     | H-1, H-2, H-8, H-30     |
| 20       | 83.4 C                             |                                                       |                                    |                         |
| 21       | 26.6 CH <sub>3</sub>               | 1.47 s                                                | C: 17, 20, 22                      | H-12, H-17, H-23        |
| 22       | 38.6 CH <sub>2</sub>               | 1.80 m<br>1.60 m                                      |                                    |                         |
| 23       | 22.9 CH <sub>2</sub>               | 2.26 m<br>2.03 m                                      |                                    |                         |
| 24       | 123.7 CH                           | 5.03 m                                                |                                    | H-22                    |
| 25       | 132.0 C                            |                                                       |                                    |                         |
| 26       | 25.5 CH <sub>3</sub>               | 1.55 s                                                | C: 24, 25, 27                      | H-24                    |
| 27       | 17.4 CH <sub>3</sub>               | 1.53 s                                                | C: 24, 25, 26                      | H-23                    |
| 30       | 16.3 CH <sub>3</sub>               | 0.88 s                                                | C: 3, 4, 5, 31                     | H-2, H-6, H-19, H-31    |
| 31       | 27.8 CH <sub>3</sub>               | 1.10 s                                                | C: 3, 4, 5, 30                     | H-3, H-5, H-6, H-30     |
| 32       | 20.5 CH <sub>3</sub>               | 0.88 s                                                | C: 8, 13, 14, 15                   | H-7, H-12, H-15, H-17   |

<sup>a</sup> Recorded at 176.04 MHz in C<sub>5</sub>D<sub>5</sub>N. <sup>b</sup> Recorded at 700.13 MHz in C<sub>5</sub>D<sub>5</sub>N.

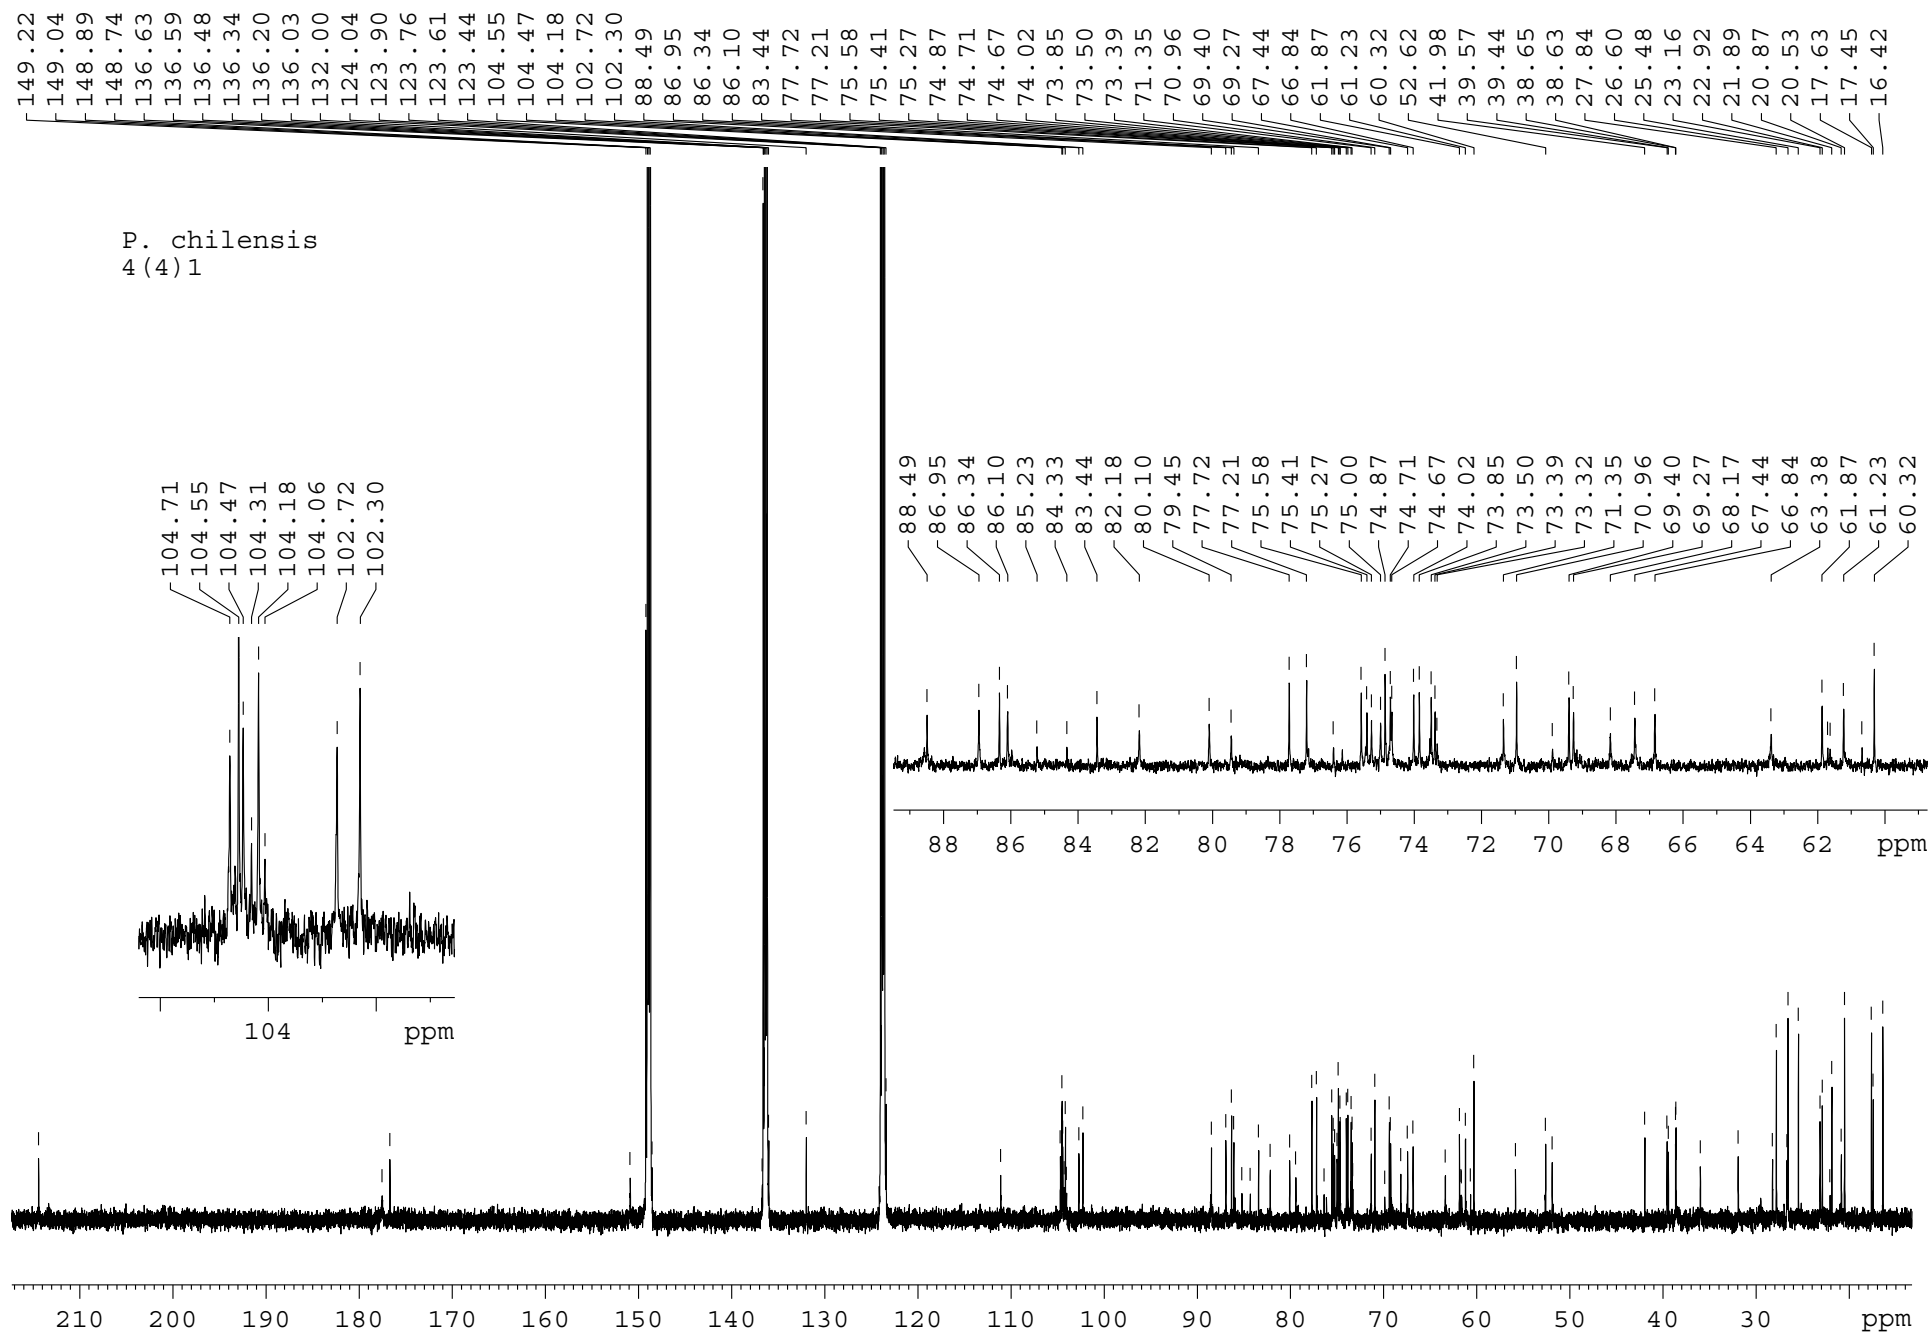

Figure S17. The  $^{13}\text{C}$  NMR (125.67 MHz) spectrum of chilensoside G (3) in  $\text{C}_5\text{D}_5\text{N}/\text{D}_2\text{O}$  (4/1)

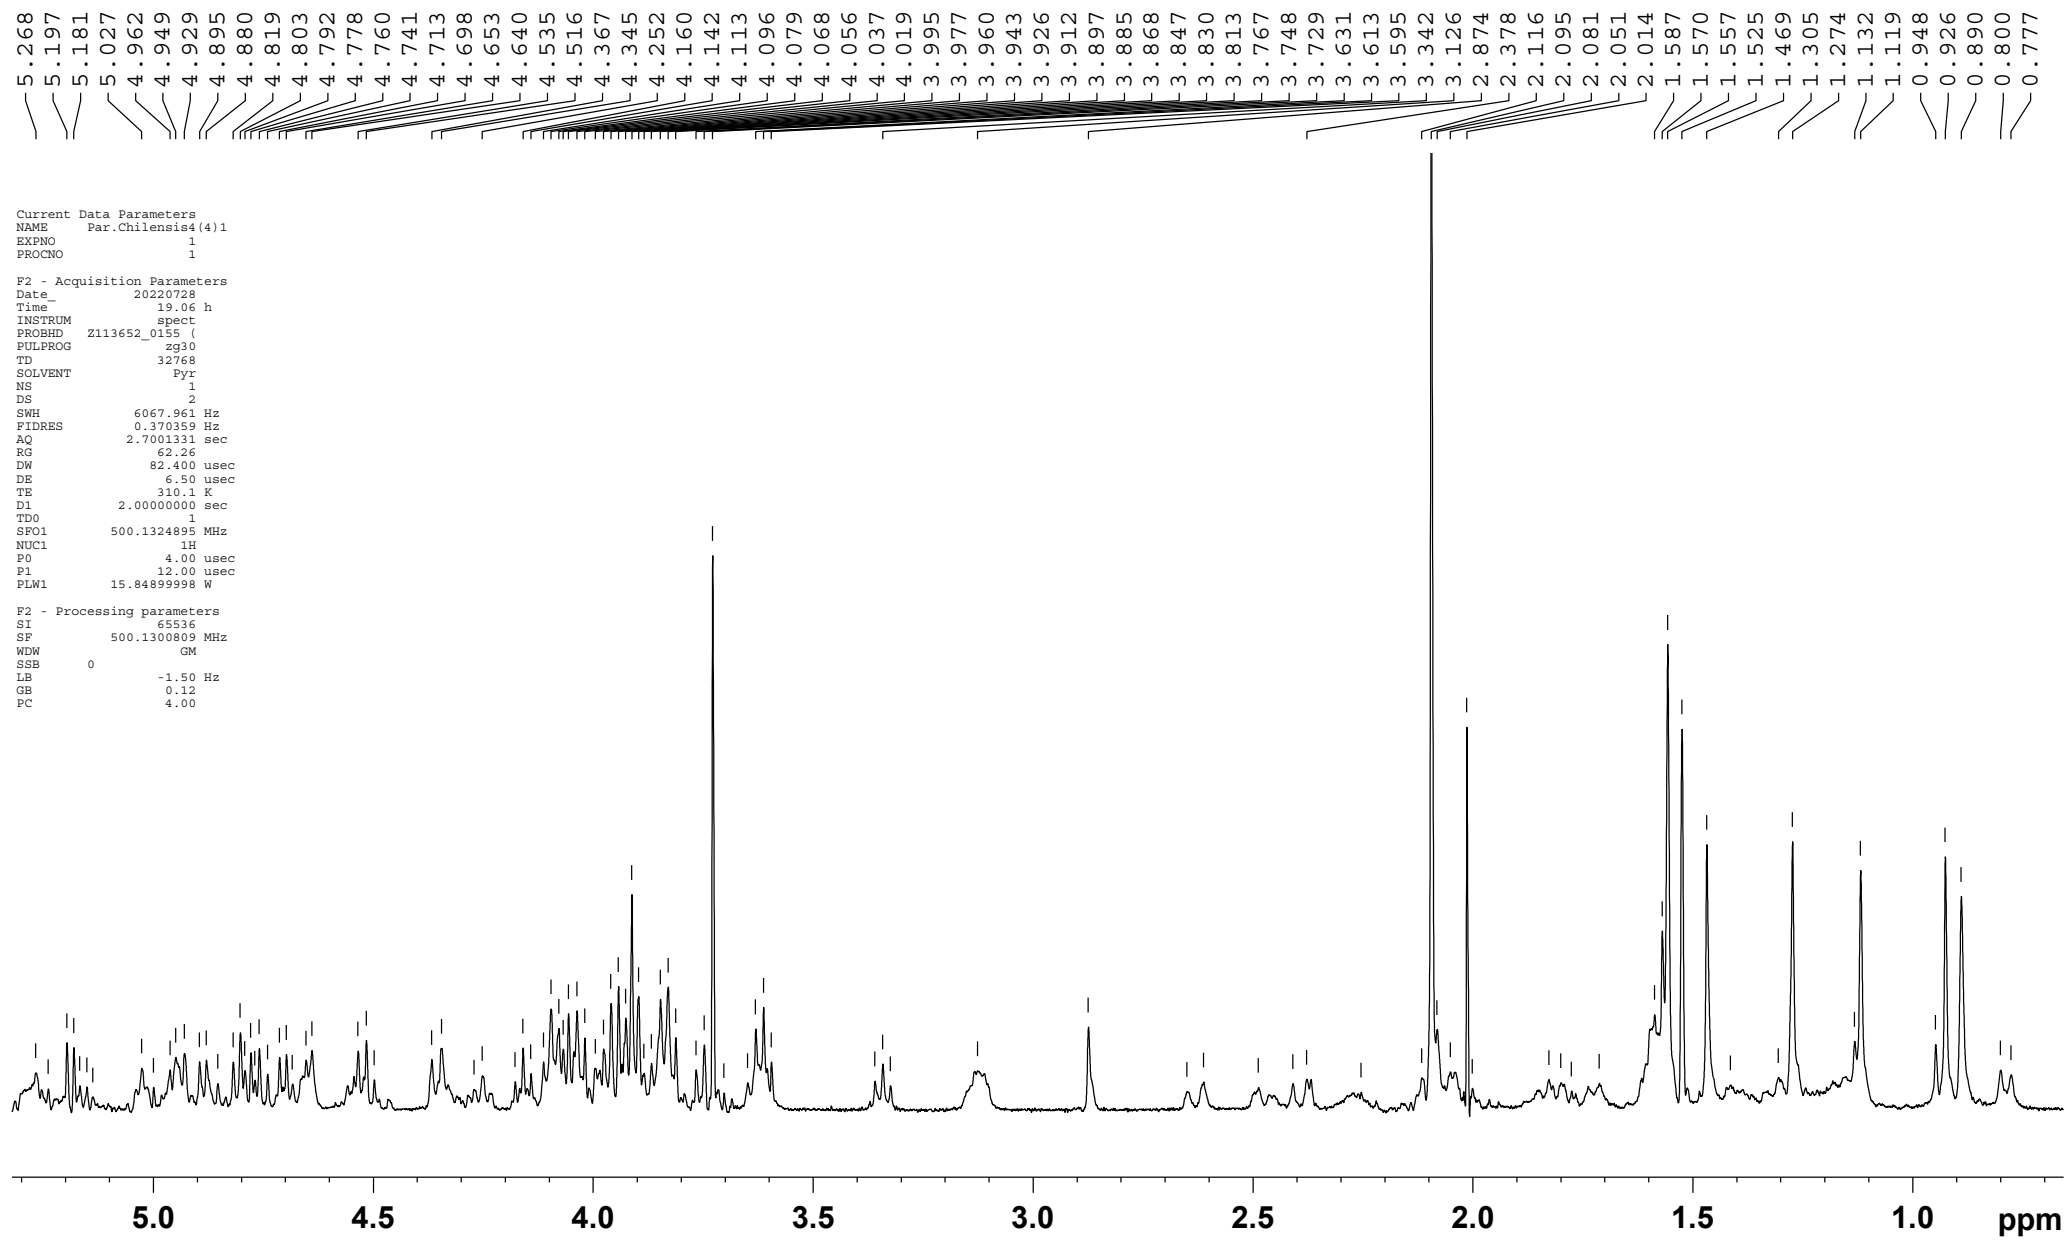

Figure S18. The  $^1\text{H}$  NMR (500.12 MHz) spectrum of chilensoside G (**3**) in  $\text{C}_5\text{D}_5\text{N}/\text{D}_2\text{O}$  (4/1)

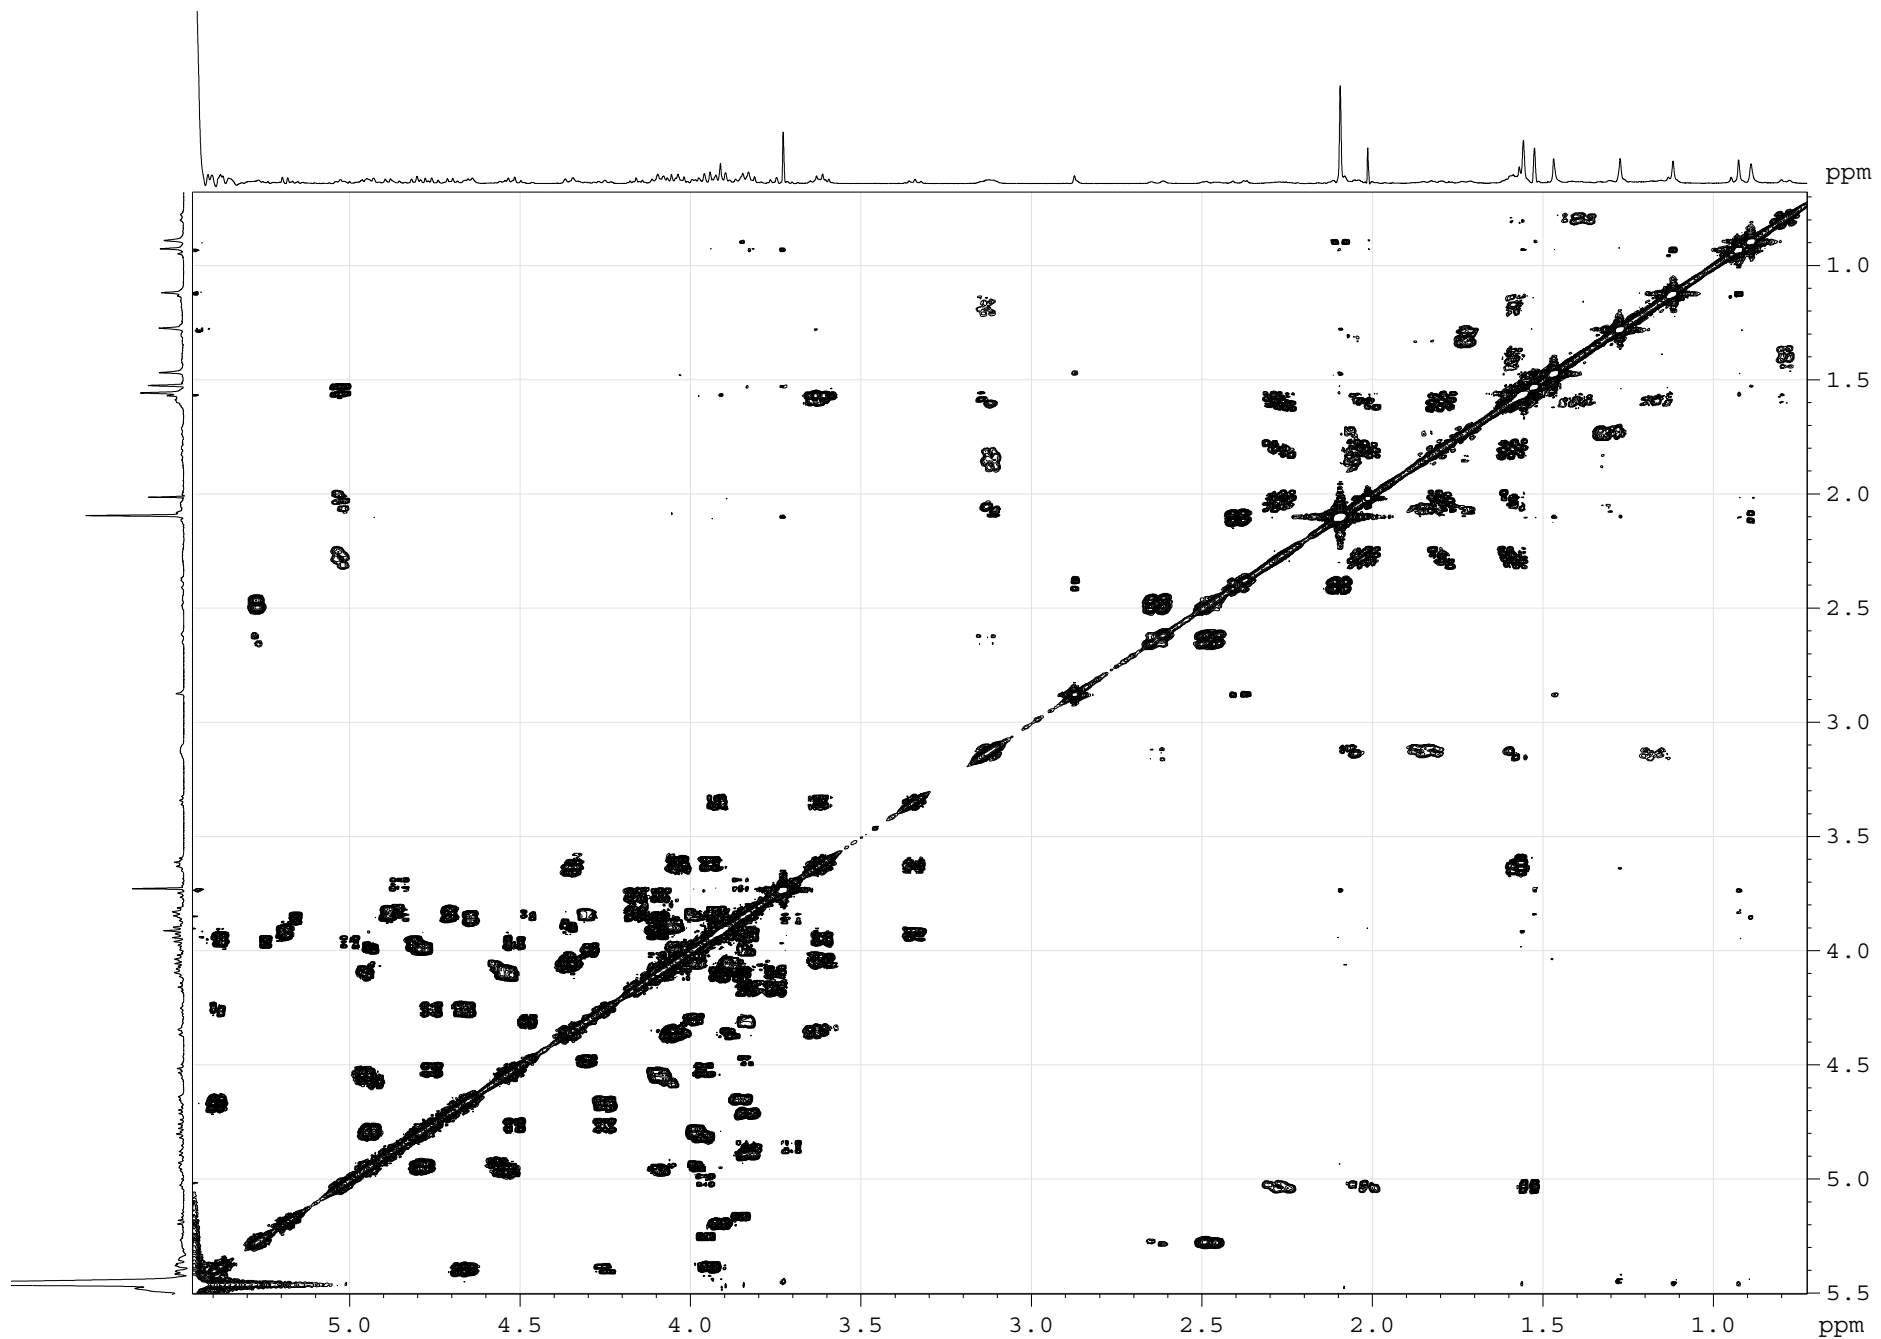

Figure S19. The COSY (500.12 MHz) spectrum of chilensoside G (3) in C<sub>5</sub>D<sub>5</sub>N/D<sub>2</sub>O (4/1)

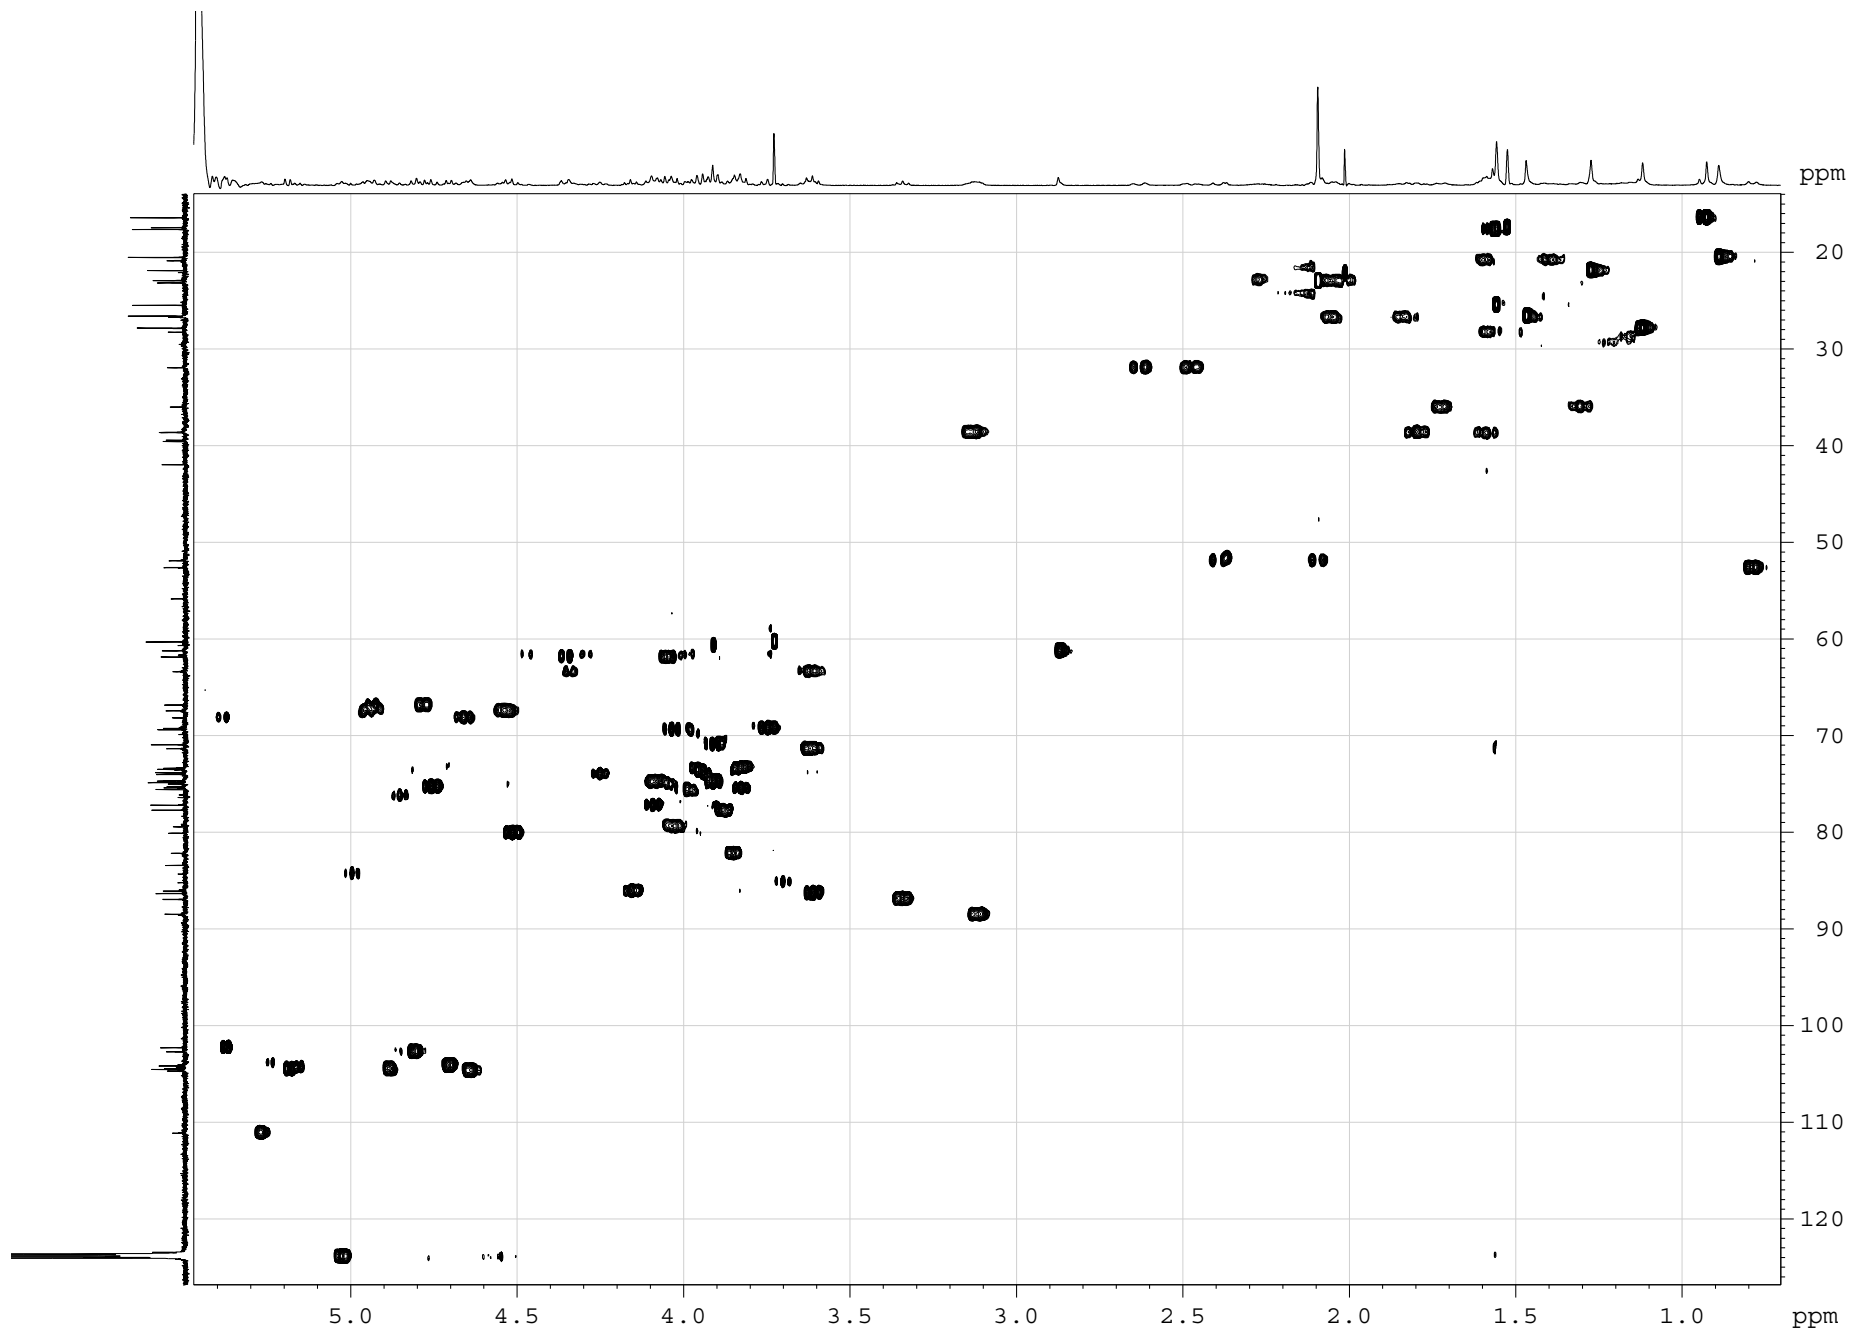

Figure S20. The HSQC (500.12 MHz) spectrum of chilensoside G (**3**) in  $\text{C}_5\text{D}_5\text{N}/\text{D}_2\text{O}$  (4/1)

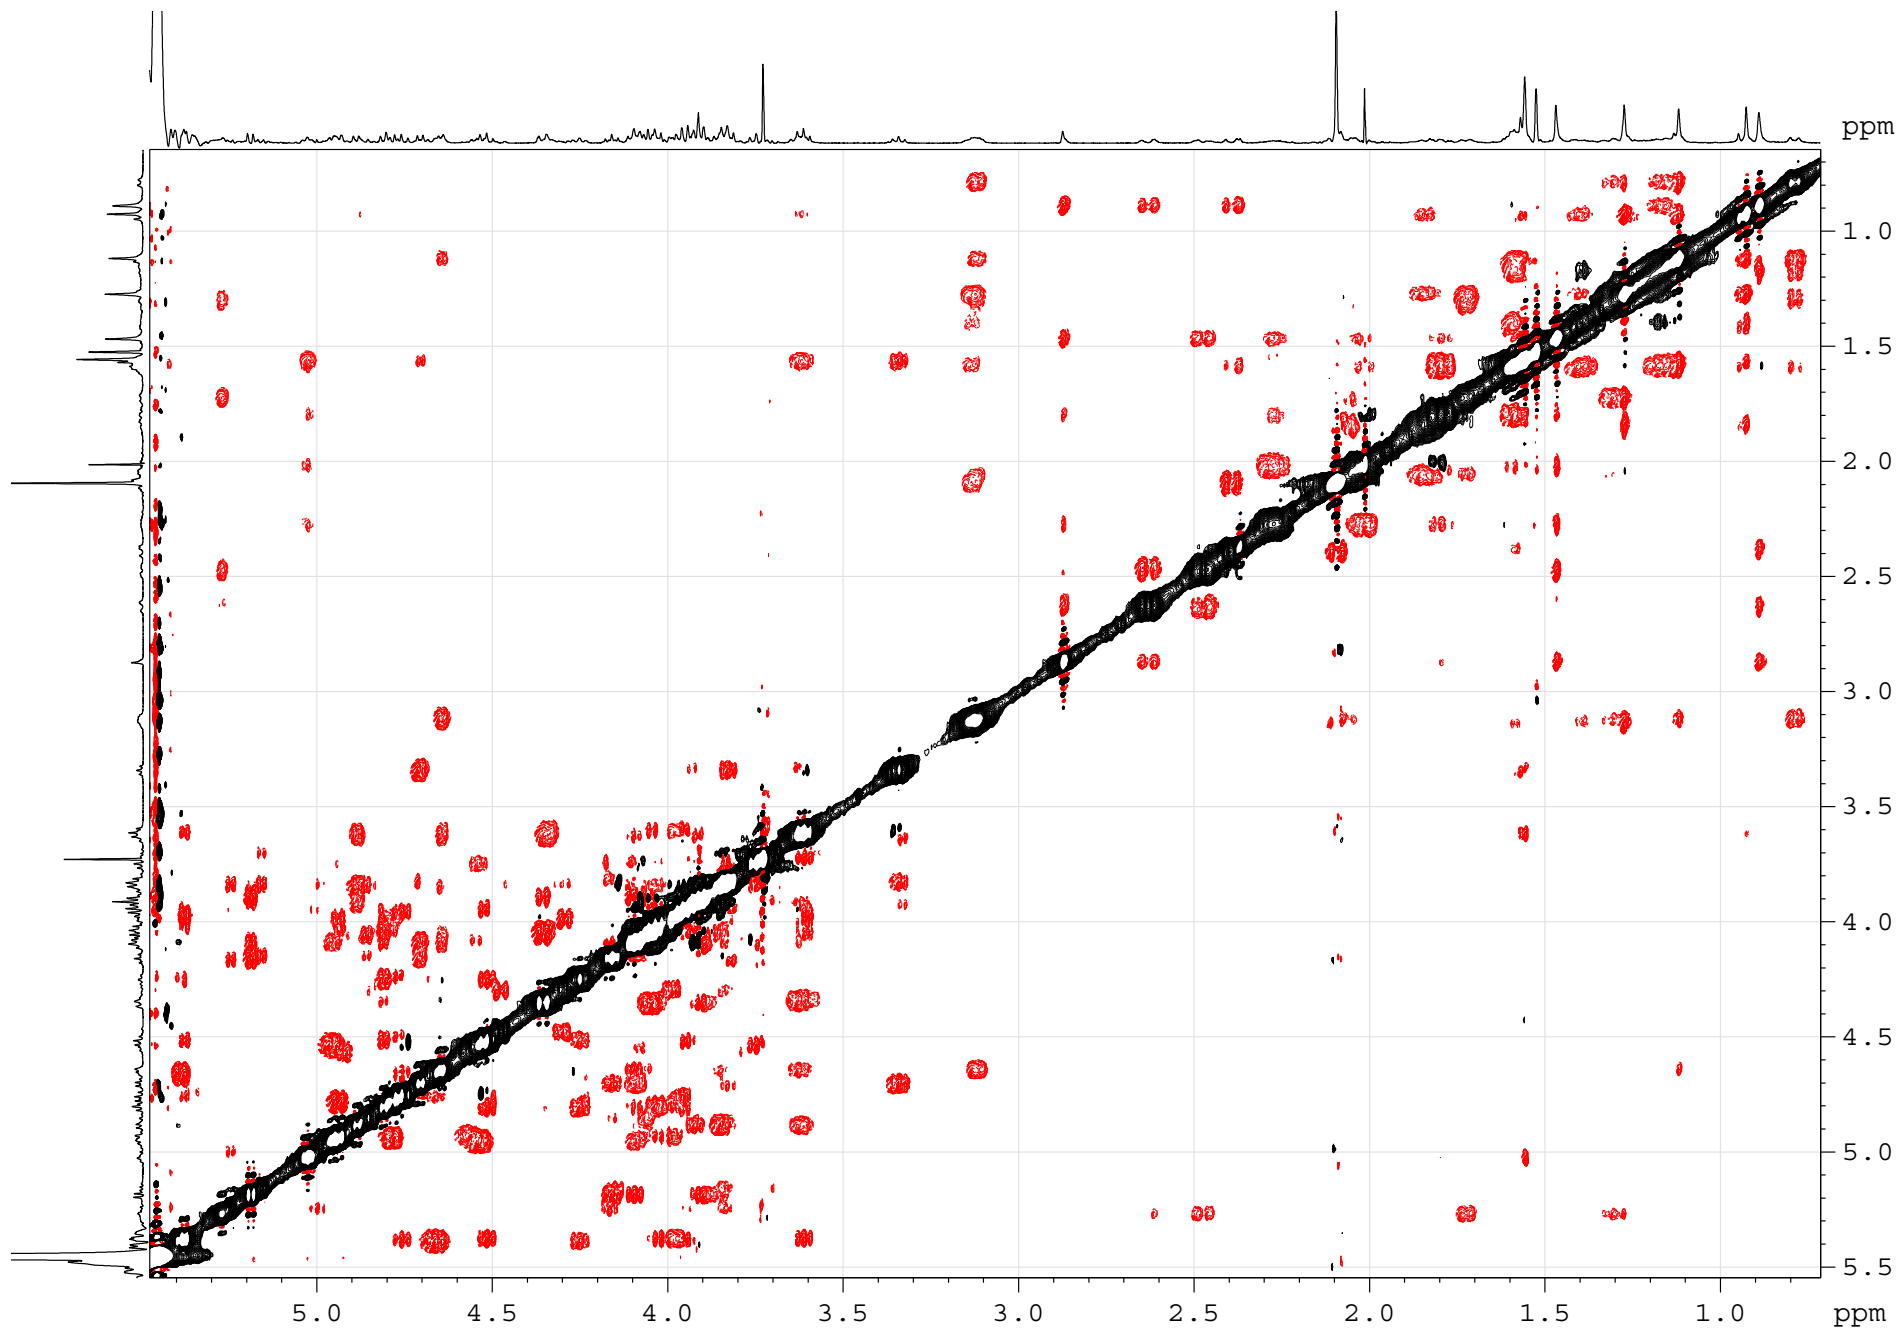

Figure S21. The ROESY (500.12 MHz) spectrum of chilensoside G (**3**) in C<sub>5</sub>D<sub>5</sub>N/D<sub>2</sub>O (4/1)



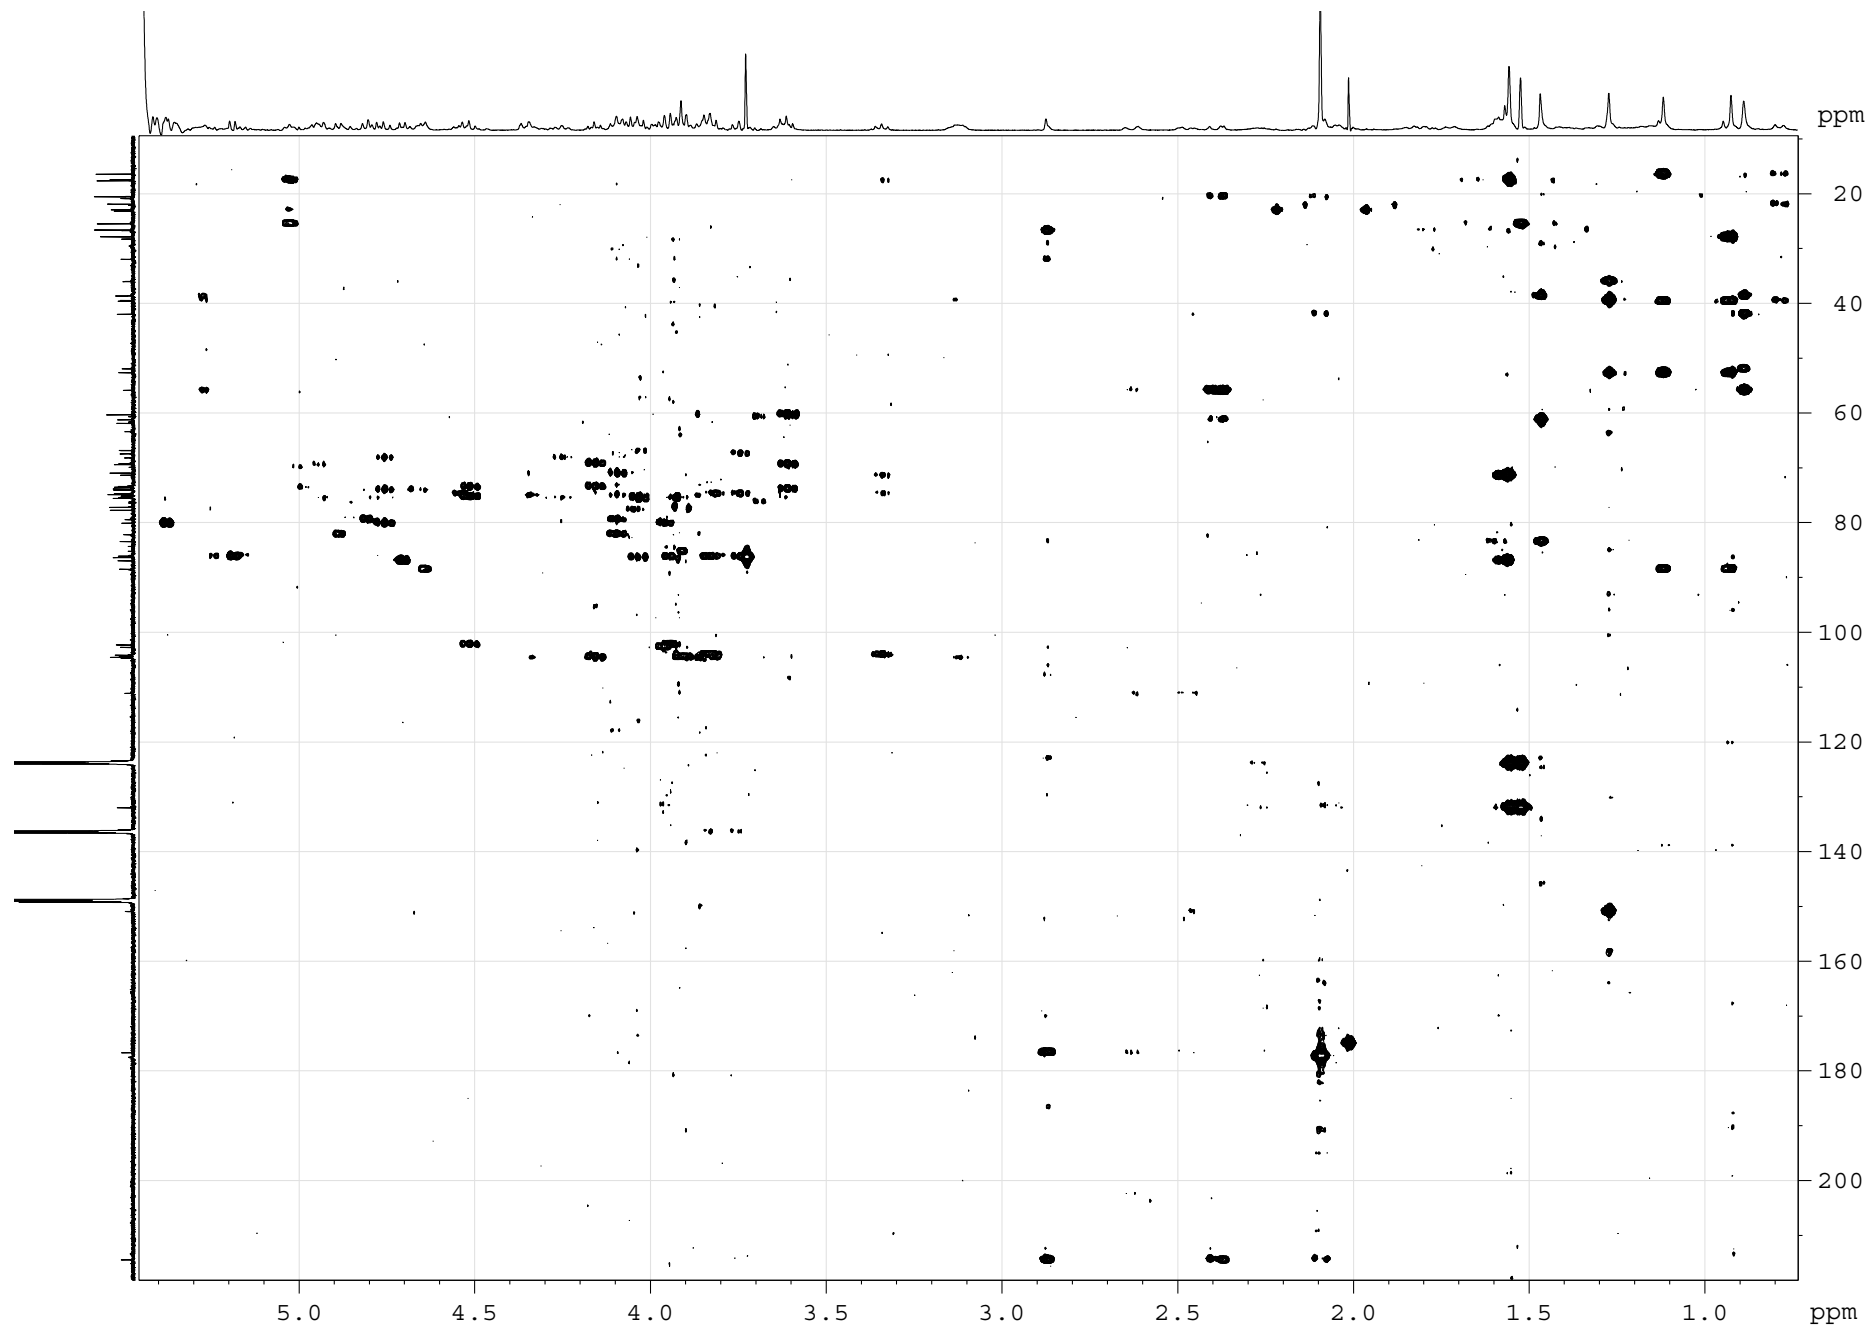

Figure S22. The HMBC (500.12 MHz) spectrum of chilensoside G (**3**) in  $\text{C}_5\text{D}_5\text{N}/\text{D}_2\text{O}$  (4/1)

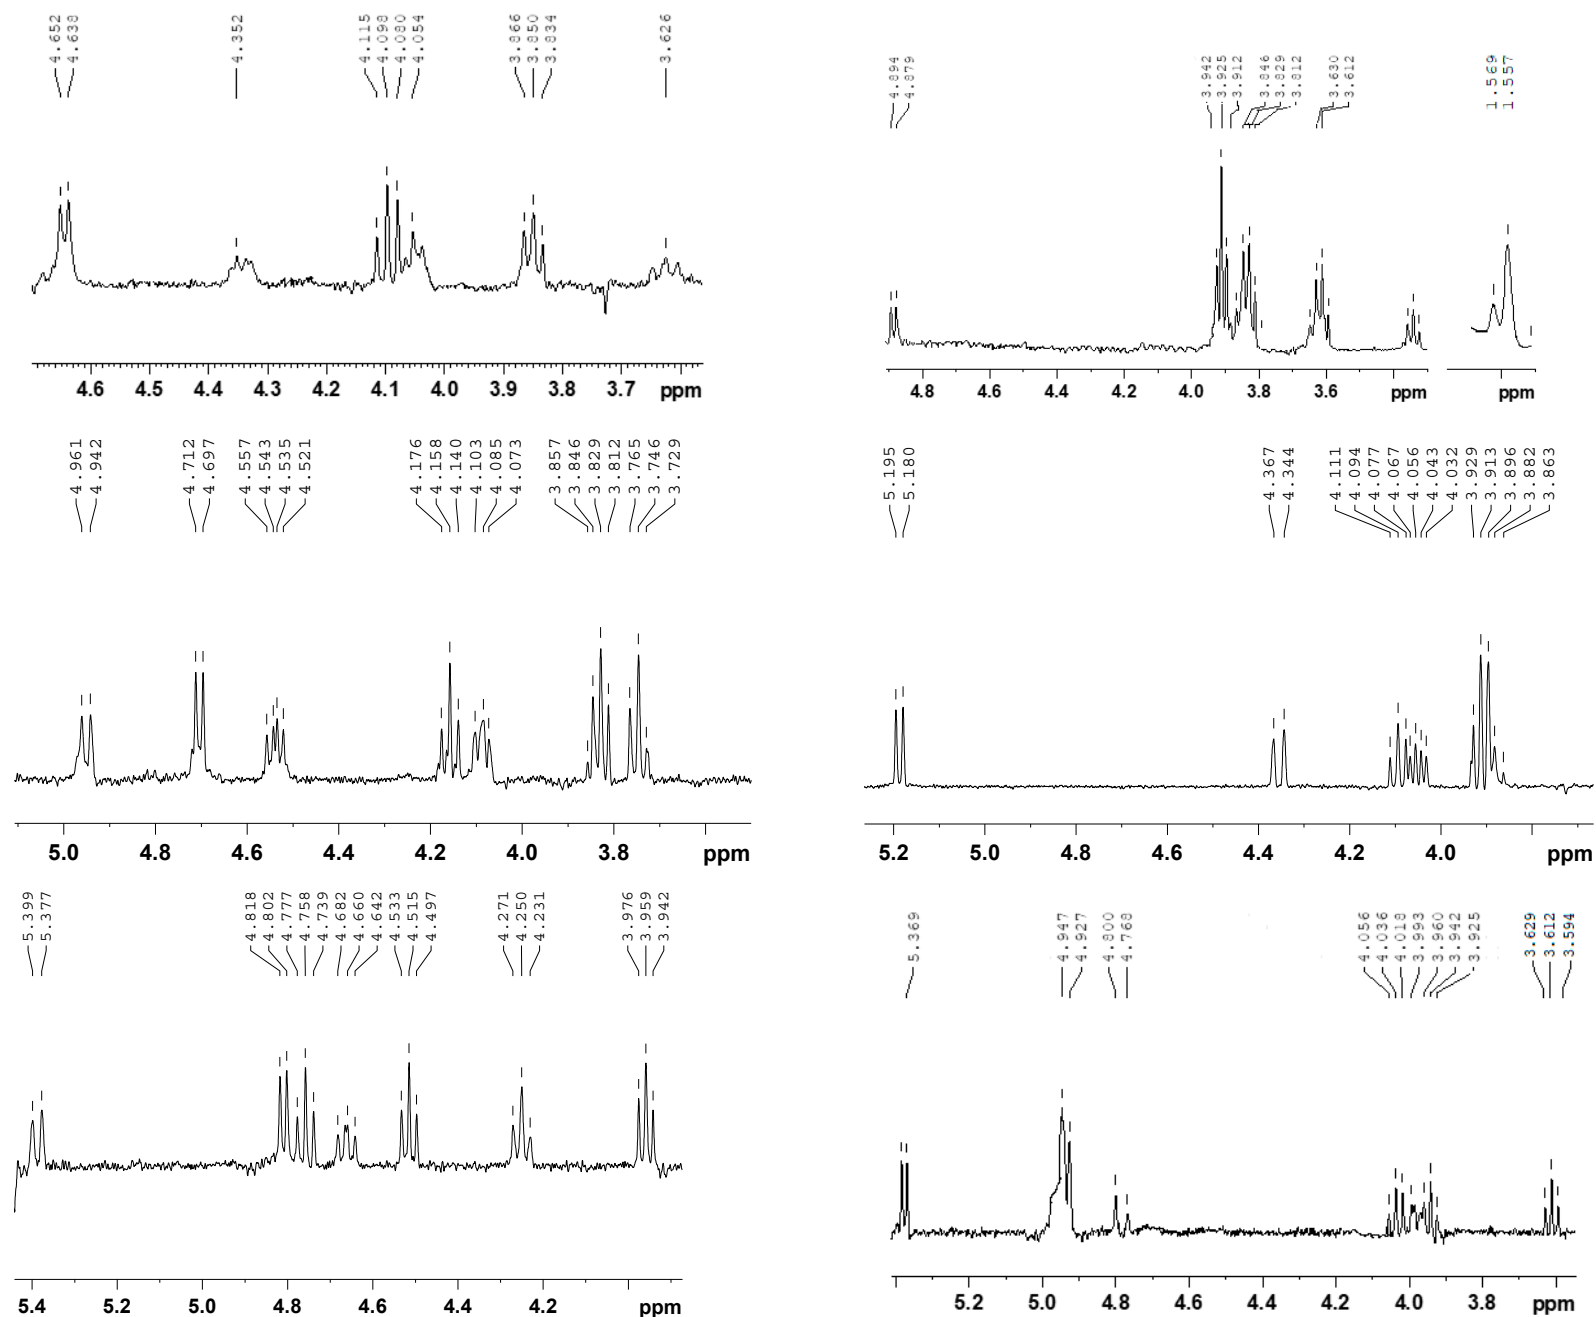

Figure S23. 1D TOCSY (500.12 MHz) spectra of Xyl1, Qui2, Glc3, Glc4, Glc5 and MeGlc6 of chilensoside G (**3**) in C<sub>5</sub>D<sub>5</sub>N/D<sub>2</sub>O (4/1)

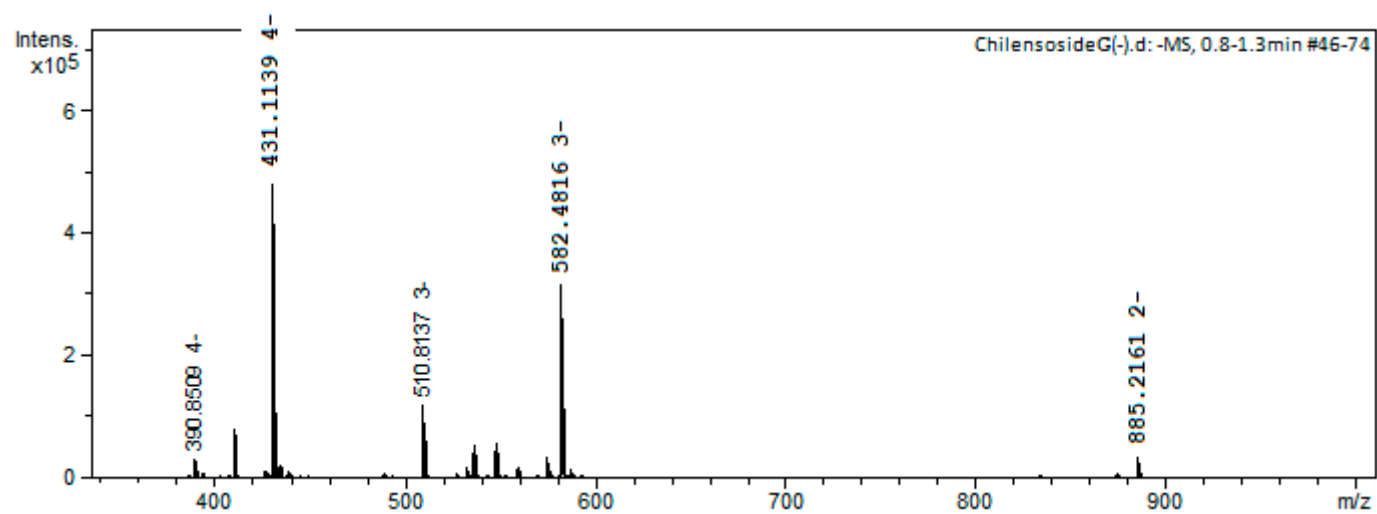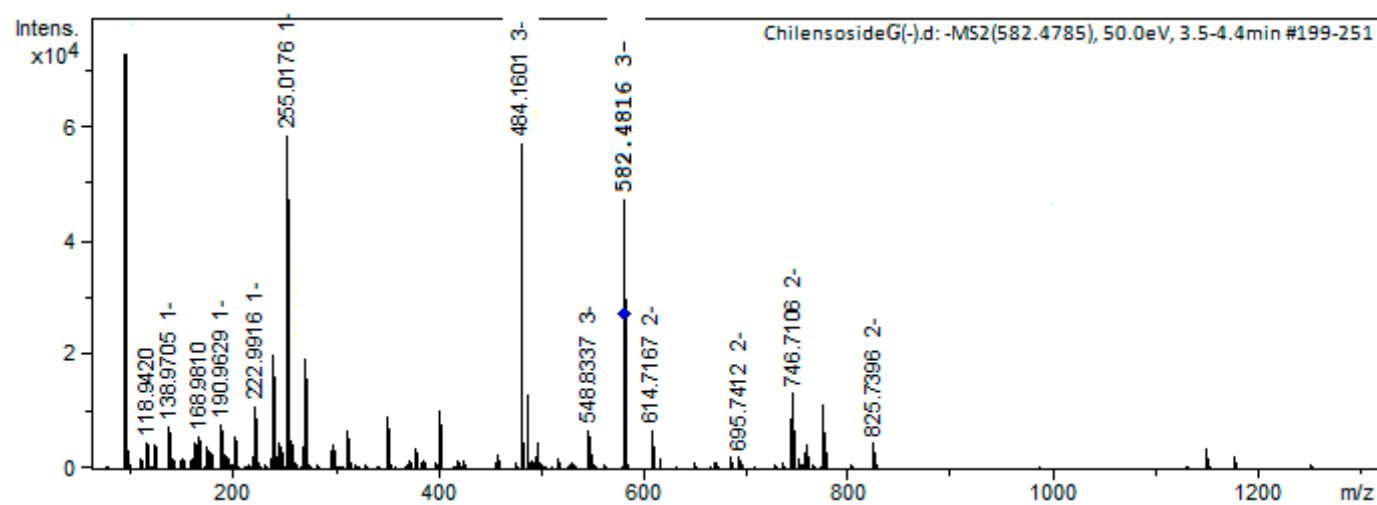

Figure S24. HR-ESI-MS and ESI-MS/MS spectra of chilensoside G (3)

**Table S2.** <sup>13</sup>C and <sup>1</sup>H NMR chemical shifts, HMBC and ROESY correlations of the aglycone moiety of chilensoside G (3).

| Position | $\delta_{\text{mult.}}^{\text{a}}$ | $\delta_{\text{mult.}}^{\text{b}}$ (J in Hz) <sup>b</sup> | HMBC                               | ROESY                    |
|----------|------------------------------------|-----------------------------------------------------------|------------------------------------|--------------------------|
| 1        | 36.0 CH <sub>2</sub>               | 1.73 m<br>1.32 m                                          |                                    | H-11<br>H-3              |
| 2        | 26.7 CH <sub>2</sub>               | 2.06 m<br>1.83 m                                          |                                    | H-19, H-30               |
| 3        | 88.5 CH                            | 3.11 dd (4.4; 11.5)                                       |                                    | H-1, H-5, H-31, H1-Xyl1  |
| 4        | 39.4 C                             |                                                           |                                    |                          |
| 5        | 52.6 CH                            | 0.78 brd (11.5)                                           | C: 4, 6, 19, 30                    | H-1, H-3, H-7            |
| 6        | 20.9 CH <sub>2</sub>               | 1.59 m<br>1.40 m                                          |                                    | H-8, H-30                |
| 7        | 28.3 CH <sub>2</sub>               | 1.60 m<br>1.17 m                                          |                                    | H-15<br>H-5, H-32        |
| 8        | 38.7 CH                            | 3.13 m                                                    |                                    | H-6, H-15, H-19          |
| 9        | 151.1 C                            |                                                           |                                    |                          |
| 10       | 39.4 C                             |                                                           |                                    |                          |
| 11       | 111.3 CH                           | 5.29 brd (5.2)                                            | C: 10, 13                          | H-1                      |
| 12       | 31.9 CH <sub>2</sub>               | 2.65 brd (17.1)<br>2.49 dd (6.0; 17.1)                    | C: 11, 18<br>C: 11, 14             | H-17, H-32<br>H-17, H-21 |
| 13       | 55.8 C                             |                                                           |                                    |                          |
| 14       | 42.0 C                             |                                                           |                                    |                          |
| 15       | 51.9 CH <sub>2</sub>               | 2.41 d (15.6)<br>2.10 d (15.6)                            | C: 13, 16, 17, 32<br>C: 14, 16, 32 | H-8                      |
| 16       | 214.4 C                            |                                                           |                                    |                          |
| 17       | 61.2 CH                            | 2.90 s                                                    | C: 12, 13, 16, 18, 20, 21          | H-12, H-23, H-32         |
| 18       | 176.8 C                            |                                                           |                                    |                          |
| 19       | 21.9 CH <sub>3</sub>               | 1.29 s                                                    | C: 1, 5, 9, 10                     | H-1, H-2, H-8, H-30      |
| 20       | 83.4 C                             |                                                           |                                    |                          |
| 21       | 26.6 CH <sub>3</sub>               | 1.48 s                                                    | C: 17, 20, 22                      | H-12, H-17, H-23         |
| 22       | 38.6 CH <sub>2</sub>               | 1.80 m<br>1.60 m                                          |                                    |                          |
| 23       | 23.2 CH <sub>2</sub>               | 2.29 m<br>2.04 m                                          |                                    | H-21                     |
| 24       | 124.0 CH                           | 5.03 m                                                    |                                    | H-22                     |
| 25       | 132.1 C                            |                                                           |                                    |                          |
| 26       | 25.5 CH <sub>3</sub>               | 1.55 s                                                    | C: 24, 25, 27                      | H-24                     |
| 27       | 17.4 CH <sub>3</sub>               | 1.52 s                                                    | C: 24, 25, 26                      | H-23                     |
| 30       | 16.4 CH <sub>3</sub>               | 0.90 s                                                    | C: 3, 4, 5, 31                     | H-2, H-6, H-19, H-31     |
| 31       | 27.8 CH <sub>3</sub>               | 1.10 s                                                    | C: 3, 4, 5, 30                     | H-3, H-5, H-6, H-30      |
| 32       | 20.5 CH <sub>3</sub>               | 0.89 s                                                    | C: 8, 13, 14, 15                   | H-7, H-12, H-15, H-17    |

<sup>a</sup> Recorded at 125.67 MHz in C<sub>5</sub>D<sub>5</sub>N. <sup>b</sup> Recorded at 500.12 MHz in C<sub>5</sub>D<sub>5</sub>N.
